# Supplementary material for: Frequent Long-Range Epigenetic Silencing of Protocadherin Gene Clusters on Chromosome 5q31 in Wilms' Tumor
Source: PLoS Genet. 2009 Nov 26;5(11):e1000745. doi: 10.1371/journal.pgen.1000745 (PMC2776977; doi:10.1371/journal.pgen.1000745)
Supplement: Table S1 — Wilms' tumour hypermethylated genes identified by MeDIP-chip. Summary table of hypermethylated genes identified by MeDIP-chip in five Wilms' tumours (P<0.05). Ensembl gene ID, gene symbol, and co-ordinates by chromosome and gene start (HG18 genome build) are given. The frequency of hypermethylation is given in the final column. Blanks in the Gene name column represent Refseq unannotated genes. (0.23 MB XLS) [file pgen.1000745.s009.xls]

## Sheet: MeDIP-chip
Table S1. Wilms' tumour hypermethylated genes identified by MeDIP-chip.
Ensembl gene ID	Gene symbol	Chromosome	HG18 gene start (bp)	Number of tumours
ENSG00000146556	Q7Z3N4_HUMAN	1	4274	1
ENSG00000187961	KLHL17	1	885830	5
ENSG00000188290	HES4	1	924208	1
ENSG00000188157	AGRN	1	945366	1
ENSG00000131591	C1orf159	1	1007061	1
ENSG00000215916	Q6ZVV0_HUMAN	1	1007068	1
ENSG00000162576	MXRA8	1	1277935	1
ENSG00000175756	AURKAIP1	1	1298973	1
ENSG00000197785	ATAD3A	1	1437394	1
ENSG00000197530	MIB2	1	1540736	2
ENSG00000189409	MMP23B	1	1557421	1
ENSG00000215914	A2AGN1_HUMAN	1	1557423	2
ENSG00000215790	SLC35E2	1	1646137	2
ENSG00000142609	KIAA1751	1	1874612	4
ENSG00000067606	PRKCZ	1	1971769	3
ENSG00000157933	SKI	1	2149994	4
ENSG00000116151	MORN1	1	2242556	1
ENSG00000157916	RER1	1	2313074	1
ENSG00000142611	PRDM16	1	2975604	2
ENSG00000116198	KIAA0562	1	3721204	1
ENSG00000187017	ESPN	1	6407435	1
ENSG00000215788	TNFRSF25	1	6443798	1
ENSG00000171735	CAMTA1	1	6767971	2
ENSG00000142583	SLC2A5	1	9019594	1
ENSG00000171608	PIK3CD	1	9634390	1
ENSG00000130939	UBE4B	1	10015630	1
ENSG00000130940	CASZ1	1	10619267	1
ENSG00000177000	MTHFR	1	11768367	1
ENSG00000116685	KIAA2013	1	11782803	1
ENSG00000011021	CLCN6	1	11788855	1
ENSG00000186301	Q49A61_HUMAN	1	16843841	3
ENSG00000116219	ESPNP	1	16890302	2
ENSG00000186715	MSTP9	1	16953992	3
ENSG00000117118	SDHB	1	17217817	1
ENSG00000053371	AKR7A2	1	19503046	2
ENSG00000040487	PQLC2	1	19511327	2
ENSG00000162543	UBXD3	1	20385168	1
ENSG00000183114	FAM43B	1	20751519	1
ENSG00000142794	NBPF3	1	21639217	1
ENSG00000188529	FUSIP1	1	24163881	1
ENSG00000020633	RUNX3	1	25098589	1
ENSG00000117616	C1orf63	1	25441328	1
ENSG00000117632	STMN1	1	26099196	1
ENSG00000198830	HMGN2	1	26671593	1
ENSG00000142751	ATPBD1B	1	27078460	1
ENSG00000090273	NUDC	1	27120811	1
ENSG00000158246	FAM46B	1	27204100	1
ENSG00000142765	SYTL1	1	27541100	1
ENSG00000117748	RPA2	1	28090637	1
ENSG00000158156	XKR8	1	28158560	1
ENSG00000130770	ATPIF1	1	28435198	1
ENSG00000060656	PTPRU	1	29435634	2
ENSG00000084636	COL16A1	1	31890435	1
ENSG00000025800	KPNA6	1	32346231	1
ENSG00000116497	S100PBP	1	33055630	1
ENSG00000121905	HPCA	1	33124685	1
ENSG00000126067	PSMB2	1	35808000	1
ENSG00000214193	C1orf113	1	36545305	1
ENSG00000142694	C1orf78	1	36560219	1
ENSG00000163874	ZC3H12A	1	37712740	2
ENSG00000183317	EPHA10	1	37952148	1
ENSG00000197982	C1orf122	1	38045238	1
ENSG00000183431	SF3A3	1	38195786	1
ENSG00000185668	POU3F1	1	38282086	1
ENSG00000174574	C1orf108	1	39229504	1
ENSG00000090621	PABPC4	1	39799075	1
ENSG00000187801	ZNF643	1	40688366	1
ENSG00000117013	KCNQ4	1	41022271	1
ENSG00000179862	CITED4	1	41099310	1
ENSG00000204060		1	41600181	1
ENSG00000198815	FOXJ3	1	42414797	1
ENSG00000164008	C1orf50	1	43005527	1
ENSG00000117407	ARTN	1	44171579	1
ENSG00000126107	HECTD3	1	45240797	2
ENSG00000132763	MMACHC	1	45738312	1
ENSG00000117450	PRDX1	1	45749295	1
ENSG00000132780	NASP	1	45822304	1
ENSG00000086015	MAST2	1	46041872	1
ENSG00000117461	PIK3R3	1	46278399	1
ENSG00000186564	FOXD2	1	47674276	2
ENSG00000142700	DMRTA2	1	50656695	1
ENSG00000117862	TXNDC12	1	52258394	1
ENSG00000058799	YIPF1	1	54089994	1
ENSG00000116133	DHCR24	1	55087888	1
ENSG00000173406	DAB1	1	57233039	1
ENSG00000184292	TACSTD2	1	58813683	1
ENSG00000198160	MIER1	1	67153227	1
ENSG00000142864	SERBP1	1	67646081	1
ENSG00000024526	DEPDC1	1	68713527	1
ENSG00000118454	ANKRD13C	1	70500138	1
ENSG00000197568	HHLA3	1	70593081	1
ENSG00000050628	PTGER3	1	71090624	1
ENSG00000117114	LPHN2	1	81544439	1
ENSG00000174021	GNG5	1	84736603	1
ENSG00000122432	SPATA1	1	84744562	1
ENSG00000142871	CYR61	1	85819005	1
ENSG00000162676	GFI1	1	92712907	1
ENSG00000067208	EVI5	1	92746841	1
ENSG00000143033	MTF2	1	93317431	1
ENSG00000117500	TMED5	1	93390018	1
ENSG00000122483	CCDC18	1	93418508	1
ENSG00000162627	SNX7	1	98899801	1
ENSG00000079335	CDC14A	1	100590635	1
ENSG00000168710	AHCYL1	1	110328831	1
ENSG00000116396	KCNC4	1	110555588	1
ENSG00000197852	C1orf183	1	112069893	2
ENSG00000155366	RHOC	1	113045272	1
ENSG00000081019	RSBN1	1	114105977	1
ENSG00000175984	DENND2C	1	114926992	1
ENSG00000134198	TSPAN2	1	115392155	1
ENSG00000203853	Q6ZVH8_HUMAN	1	120638912	1
ENSG00000215863	A2RUM1_HUMAN	1	142439162	1
ENSG00000203846	Q6ZVH8_HUMAN	1	142625689	1
ENSG00000181039	ANKRD34	1	144181865	1
ENSG00000131779	PEX11B	1	144227740	1
ENSG00000131788	PIAS3	1	144287345	1
ENSG00000121848	ZNF364	1	144322393	1
ENSG00000178669	NM_207400	1	146301751	1
ENSG00000212661	Q6ZVI0_HUMAN	1	147552949	1
ENSG00000208696		1	147553983	1
ENSG00000208674		1	147939529	1
ENSG00000183941	H4_HUMAN	1	148070845	1
ENSG00000184678	HIST2H2BA	1	148080395	1
ENSG00000182217	HIST2H4B	1	148092231	1
ENSG00000178096	BOLA1	1	148125110	2
ENSG00000184270	HIST2H2AB	1	148125698	1
ENSG00000143384	MCL1	1	148813661	1
ENSG00000143420	ENSA	1	148840214	1
ENSG00000159450	TCHH	1	150345417	1
ENSG00000160716	CHRNB2	1	152806881	1
ENSG00000173207	CKS1B	1	153213753	1
ENSG00000143620	EFNA4	1	153302837	1
ENSG00000160767	C1orf2	1	153483621	1
ENSG00000176444	CLK2	1	153499289	1
ENSG00000143627	PKLR	1	153526254	1
ENSG00000160753	RUSC1	1	153557311	1
ENSG00000203759		1	154312989	1
ENSG00000143320	CRABP2	1	154936034	1
ENSG00000198400	NTRK1	1	155052166	1
ENSG00000027644	INSRR	1	155077289	1
ENSG00000162706	CADM3	1	157408040	2
ENSG00000188004	VSIG8	1	158070888	2
ENSG00000213085	CCDC19	1	158108780	1
ENSG00000162728	KCNJ9	1	158317984	1
ENSG00000162729	IGSF8	1	158327754	1
ENSG00000122218	COPA	1	158525687	1
ENSG00000162736	NCSTN	1	158579678	1
ENSG00000158769	F11R	1	159232608	1
ENSG00000215845	KAT_HUMAN	1	159274045	1
ENSG00000162755	KLHDC9	1	159334778	1
ENSG00000173110	HSPA6	1	159760660	1
ENSG00000203745	TRNAD-GUC	1	159842705	3
ENSG00000162746	FCRLB	1	159957977	1
ENSG00000162761	LMX1A	1	163437729	1
ENSG00000188859	FAM78B	1	164305880	1
ENSG00000143194	MAEL	1	165224975	2
ENSG00000143162	CREG1	1	165776877	1
ENSG00000116132	PRRX1	1	168899937	1
ENSG00000117533	VAMP4	1	169938783	1
ENSG00000197959	DNM3	1	170077261	1
ENSG00000185278	ZBTB37	1	172103843	1
ENSG00000143340	C1orf76	1	177978921	1
ENSG00000179930	ZNF648	1	180290328	1
ENSG00000135821	GLUL	1	180618292	1
ENSG00000198756	GLT25D2	1	182171589	1
ENSG00000203724	C1orf53	1	196138400	1
ENSG00000116857	TMEM9	1	199370524	1
ENSG00000081277	PKP1	1	199519203	1
ENSG00000174307	PHLDA3	1	199701245	1
ENSG00000176393	RNPEP	1	200218389	1
ENSG00000077152	UBE2T	1	200567409	1
ENSG00000183155	RABIF	1	201114711	1
ENSG00000117153	KLHL12	1	201126853	1
ENSG00000198625	MDM4	1	202752134	1
ENSG00000133069	TMCC2	1	203463661	1
ENSG00000069275	NUCKS1	1	203953732	1
ENSG00000162877	NP_689704.3	1	204063777	1
ENSG00000203712	Q6ZVH8_HUMAN	1	204303493	1
ENSG00000196550	FAM72A	1	204303958	1
ENSG00000117322	CR2	1	205694293	1
ENSG00000123689	G0S2	1	207915388	1
ENSG00000065600	C1orf75	1	210603896	1
ENSG00000162772	ATF3	1	210805320	1
ENSG00000123685	NP_061134.1	1	210926383	1
ENSG00000152104	PTPN14	1	212597634	1
ENSG00000162819	C1orf58	1	220952529	1
ENSG00000203697	CAPN8	1	221781822	1
ENSG00000162909	CAPN2	1	221966824	1
ENSG00000163041	H3F3B	1	224316175	1
ENSG00000163050	CABC1	1	225151860	1
ENSG00000168148	HIST3H3	1	226679169	1
ENSG00000181218	HIST3H2A	1	226711303	1
ENSG00000196890	HIST3H2BB	1	226712431	1
ENSG00000183929	DUSP5P	1	226811508	5
ENSG00000199352	DUSP5P repeat region	1	226812638	4
ENSG00000201588	DUSP5P repeat region	1	226814879	4
ENSG00000199337	DUSP5P repeat region	1	226817120	4
ENSG00000200381	DUSP5P repeat region	1	226819361	4
ENSG00000199396	DUSP5P repeat region	1	226821602	4
ENSG00000200624	DUSP5P repeat region	1	226823817	4
ENSG00000202521	DUSP5P repeat region	1	226826037	4
ENSG00000200343	DUSP5P repeat region	1	226828279	4
ENSG00000201321	DUSP5P repeat region	1	226830518	4
ENSG00000199910	DUSP5P repeat region	1	226832760	4
ENSG00000199334	DUSP5P repeat region	1	226835001	4
ENSG00000199270	DUSP5P repeat region	1	226837241	4
ENSG00000202526	DUSP5P repeat region	1	226839466	4
ENSG00000201355	DUSP5P repeat region	1	226841707	4
ENSG00000201925	DUSP5P repeat region	1	226843938	4
ENSG00000202257	DUSP5P repeat region	1	226846179	4
ENSG00000200370	DUSP5P repeat region	1	226848410	4
ENSG00000203681	Q5SQZ2_HUMAN	1	226849984	1
ENSG00000135801	TAF5L	1	227795481	1
ENSG00000010072	C1orf124	1	229540305	1
ENSG00000135778	C1orf57	1	231153004	1
ENSG00000168264	IRF2BP2	1	232806638	1
ENSG00000173726	TOMM20	1	233339283	1
ENSG00000054267	ARID4B	1	233396833	1
ENSG00000035687	ADSS	1	242638420	1
ENSG00000162849	KIF26B	1	243741031	1
ENSG00000185420	SMYD3	1	243979267	3
ENSG00000162852	C1orf71	1	244796386	3
ENSG00000171161	ZNF672	1	247099153	1
ENSG00000130508	PXDN	2	1614666	1
ENSG00000186487	MYT1L	2	1771894	1
ENSG00000176887	SOX11	2	5750250	1
ENSG00000134313	NP_065789.1	2	8786511	1
ENSG00000171848	RRM2	2	10179906	1
ENSG00000162975	KCNF1	2	10969514	2
ENSG00000169016	E2F6	2	11501952	2
ENSG00000162981	FAM84A	2	14690292	1
ENSG00000163029	SMC6	2	17708560	1
ENSG00000178295	NP_872431.2	2	17798658	1
ENSG00000143867	OSR1	2	19414728	1
ENSG00000183891	TTC32	2	19960001	1
ENSG00000115884	SDC1	2	20264041	1
ENSG00000205671	Q6Y2K7_HUMAN	2	20288516	1
ENSG00000143878	RHOB	2	20510316	1
ENSG00000143869	GDF7	2	20729905	1
ENSG00000115138	POMC	2	25237226	1
ENSG00000138100	TRIM54	2	27358934	1
ENSG00000172954	LYCAT	2	30523613	1
ENSG00000008869	HEATR5B	2	37061657	1
ENSG00000138061	CYP1B1	2	38148250	2
ENSG00000138039	LHCGR	2	48767425	1
ENSG00000179915	NRXN1	2	50000992	1
ENSG00000204993	LOC129656	2	52651269	3
ENSG00000119866	BCL11A	2	60531806	1
ENSG00000119862	NP_054900.2	2	64535159	1
ENSG00000119844	AFTPH	2	64604969	1
ENSG00000198369	SPRED2	2	65391492	1
ENSG00000115953	WDR92	2	68205963	1
ENSG00000119865	C2orf32	2	68373647	1
ENSG00000135638	EMX1	2	72996770	1
ENSG00000135625	EGR4	2	73371574	1
ENSG00000114993	RTKN	2	74506497	1
ENSG00000204822	MRPL53	2	74552593	1
ENSG00000179528	LBX2	2	74578153	1
ENSG00000159399	HK2	2	74913290	1
ENSG00000066032	CTNNA2	2	79732191	2
ENSG00000162951	LRRTM1	2	80378817	2
ENSG00000042445	RETSAT	2	85422733	1
ENSG00000115459	RBED1	2	85435391	1
ENSG00000115561	VPS24	2	86584064	1
ENSG00000153563	CD8A	2	86865240	2
ENSG00000187627	RGPD1	2	86988587	3
ENSG00000187984		2	94874856	1
ENSG00000144029	MRPS5	2	95116680	1
ENSG00000163067	ZNF2	2	95194910	1
ENSG00000115041	KCNIP3	2	95326799	1
ENSG00000186281	NP_997211.2	2	96051422	1
ENSG00000144028	ASCC3L1	2	96303804	1
ENSG00000158158	CNNM4	2	96790366	1
ENSG00000158185	ANKRD36	2	97143081	1
ENSG00000153165	RGPD3	2	106395649	5
ENSG00000196862	RGPD4	2	107809825	5
ENSG00000153201	RANBP2	2	108702369	1
ENSG00000163006	CCDC138	2	108769651	1
ENSG00000153094	BCL2L11	2	111594962	1
ENSG00000144161	ZC3H8	2	112689913	1
ENSG00000169629	RGPD8	2	112842437	3
ENSG00000155352	FAM39B	2	114058159	1
ENSG00000175497	DPP10	2	115636004	1
ENSG00000074047	GLI2	2	121271335	2
ENSG00000115112	TFCP2L1	2	121695003	1
ENSG00000155438	MKI67IP	2	122201027	1
ENSG00000136717	BIN1	2	127522073	1
ENSG00000072163	LIMS2	2	128112475	1
ENSG00000173349	SFT2D3	2	128175067	1
ENSG00000152086	TUBA3E	2	130665790	1
ENSG00000186825	Q580R0-2	2	132269004	1
ENSG00000115963	RND3	2	151032955	1
ENSG00000177519	RPRM	2	154042098	1
ENSG00000144283	PKP4	2	159021722	1
ENSG00000196151	WDSUB1	2	159800558	1
ENSG00000054219	LY75	2	160368122	1
ENSG00000153246	PLA2R1	2	160506258	1
ENSG00000082438	COBLL1	2	165249502	1
ENSG00000204336	Q6ZW80_HUMAN	2	171278387	1
ENSG00000128683	GAD1	2	171381446	1
ENSG00000123600	METTL8	2	171888007	1
ENSG00000115827	C2orf37	2	171999071	1
ENSG00000187876	NM_001005303	2	174908847	2
ENSG00000128652	HOXD3	2	176737051	1
ENSG00000116044	NFE2L2	2	177803279	1
ENSG00000151690	NP_060164.3	2	190981326	1
ENSG00000144381	HSPD1	2	198059555	1
ENSG00000115540	MOBKL3	2	198088565	1
ENSG00000152428	MARS2	2	198278332	1
ENSG00000152430	BOLL	2	198299848	2
ENSG00000162971	C2orf60	2	200501883	1
ENSG00000162972	C2orf47	2	200528285	1
ENSG00000163249	CCNYL1	2	208284509	1
ENSG00000163251	FZD5	2	208335577	1
ENSG00000115361	ACADL	2	210760963	1
ENSG00000115414	FN1	2	215933426	1
ENSG00000135912	TTLL4	2	219283842	1
ENSG00000171450	CDK5R2	2	219532642	1
ENSG00000163499	CRYBA2	2	219563156	1
ENSG00000187736	NHEJ1	2	219648292	1
ENSG00000144567	FAM134A	2	219751198	1
ENSG00000115657	ABCB6	2	219782738	1
ENSG00000163521	GLB1L	2	219809572	1
ENSG00000115661	STK16	2	219818436	1
ENSG00000127824	TUBA4A	2	219822677	1
ENSG00000135924	DNAJB2	2	219852284	1
ENSG00000114923	SLC4A3	2	220200293	1
ENSG00000135903	PAX3	2	222772851	1
ENSG00000163081	CCDC140	2	222871110	1
ENSG00000123983	ACSL3	2	223433976	1
ENSG00000144460	NP_065915.1	2	225973935	1
ENSG00000081052	COL4A4	2	227575671	1
ENSG00000153827	TRIP12	2	230340174	1
ENSG00000135931	ARMC9	2	231771589	1
ENSG00000163286	ALPPL2	2	232979797	1
ENSG00000135930	EIF4E2	2	233123601	1
ENSG00000115468	EFHD1	2	233206182	1
ENSG00000168918	Q6P5A4_HUMAN	2	233633433	1
ENSG00000123485	FAKTS_HUMAN	2	234410228	1
ENSG00000157985	CENTG2	2	236068070	1
ENSG00000115648	MLPH	2	238060617	1
ENSG00000132329	RAMP1	2	238432926	1
ENSG00000068024	HDAC4	2	239635329	1
ENSG00000063660	GPC1	2	241023788	1
ENSG00000130294	KIF1A	2	241301860	2
ENSG00000115687	PASK	2	241694188	2
ENSG00000115677	HDLBP	2	241815352	1
ENSG00000168385	37500	2	241903396	1
ENSG00000168393	DTYMK	2	242263830	1
ENSG00000168395	ING5	2	242290129	2
ENSG00000204098	Q6ZUI5_HUMAN	2	242573981	4
ENSG00000134108	ARL8B	3	5138930	1
ENSG00000134072	CAMK1	3	9774026	1
ENSG00000163703	CRELD1	3	9950506	1
ENSG00000163704	PRRT3	3	9962226	1
ENSG00000144560	VGLL4	3	11572544	1
ENSG00000131375	CAPN7	3	15222737	1
ENSG00000206560	ANKRD28	3	15683747	1
ENSG00000092345	DAZL	3	16603307	1
ENSG00000163508	EOMES	3	27732892	1
ENSG00000187118	NP_872329.1	3	28258123	1
ENSG00000206558	Q6UXU1_HUMAN	3	32833120	1
ENSG00000187091	PLCD1	3	38023993	1
ENSG00000172939	OXSR1	3	38182030	1
ENSG00000196653	ZNF502	3	44729142	1
ENSG00000178550	TMEM158	3	45241621	1
ENSG00000178038	ALS2CL	3	46685683	1
ENSG00000206549	TSP50_HUMAN	3	46728610	1
ENSG00000172113	NME6	3	48310595	1
ENSG00000164054	NP_057563.3	3	48484201	1
ENSG00000010256	UQCRC1	3	48611436	1
ENSG00000008300	SLC26A6	3	48637835	1
ENSG00000178149	DALRD3	3	49027439	1
ENSG00000178057	C3orf60	3	49032912	1
ENSG00000173421	CCDC36	3	49084173	1
ENSG00000185909	KLHDC8B	3	49184072	1
ENSG00000173531	MST1	3	49696393	2
ENSG00000164068	RNF123	3	49701974	1
ENSG00000176020	AMIGO3	3	49729281	2
ENSG00000173540	GMPPB	3	49733964	1
ENSG00000164077	MON1A	3	49921312	1
ENSG00000003756	RBM5	3	50101372	2
ENSG00000114349	GNAT1	3	50204047	2
ENSG00000012171	SEMA3B	3	50280044	1
ENSG00000068001	HYAL2	3	50330244	1
ENSG00000068028	RASSF1	3	50342221	2
ENSG00000004838	ZMYND10	3	50353550	1
ENSG00000010322	NISCH	3	52464660	1
ENSG00000151276	MAGI1	3	65314946	1
ENSG00000163377	FAM19A4	3	68863608	1
ENSG00000163412	EIF4E3	3	71814570	1
ENSG00000121440	PDZRN3	3	73514342	1
ENSG00000172968	LOC401074	3	75800670	3
ENSG00000179021	C3orf38	3	88281583	1
ENSG00000080819	CPOX	3	99780982	1
ENSG00000064225	ST3GAL6	3	99933842	1
ENSG00000066422	ZBTB11	3	102850981	1
ENSG00000174166	Q9BTX9_HUMAN	3	102877964	1
ENSG00000114487	MORC1	3	110159779	1
ENSG00000214369	Q9H743_HUMAN	3	114719249	1
ENSG00000072858	SIDT1	3	114733908	1
ENSG00000181722	ZBTB20	3	115540230	1
ENSG00000144847	IGSF11	3	120102173	1
ENSG00000082684	SEMA5B	3	124110733	2
ENSG00000173175	ADCY5	3	124485481	1
ENSG00000082781	ITGB5	3	125964488	1
ENSG00000144909	OSBPL11	3	126730392	1
ENSG00000144908	ALDH1L1	3	127305098	1
ENSG00000163884	KLF15	3	127544191	1
ENSG00000180767	CHST13	3	127725866	1
ENSG00000175792	RUVBL1	3	129282493	1
ENSG00000179348	GATA2	3	129680962	1
ENSG00000004399	PLXND1	3	130756708	1
ENSG00000196455	PIK3R4	3	131880469	1
ENSG00000114098	ARMC8	3	139388838	1
ENSG00000158220	FAM62C	3	139636109	1
ENSG00000184814	NP_001013672.1	3	140221396	2
ENSG00000206260	Q6ZRP0_HUMAN	3	140245364	2
ENSG00000174963	ZIC4	3	148586527	1
ENSG00000144891	AGTR1	3	149898355	1
ENSG00000070087	PFN2	3	151165384	1
ENSG00000196428	TSC22D2	3	151608812	2
ENSG00000181467	RAP2B	3	154362719	1
ENSG00000174928	C3orf33	3	156963095	1
ENSG00000163655	GMPS	3	157071019	1
ENSG00000186432	KPNA4	3	161700658	2
ENSG00000085276	EVI1	3	170285244	1
ENSG00000013297	CLDN11	3	171619359	1
ENSG00000075420	FNDC3B	3	173240112	1
ENSG00000121853	GHSR	3	173645617	2
ENSG00000161202	DVL3	3	185355978	1
ENSG00000177383	MAGEF1	3	185911380	1
ENSG00000171656	ETV5	3	187246804	2
ENSG00000178732	GP5	3	195596839	2
ENSG00000145014	TMEM44	3	195789692	3
ENSG00000061938	TNK2	3	197074633	3
ENSG00000161217	PCYT1A	3	197449652	1
ENSG00000119227	PIGZ	3	198157612	1
ENSG00000133256	PDE6B	4	609373	1
ENSG00000185619	PCGF3	4	689554	5
ENSG00000178950	GAK	4	833066	2
ENSG00000145217	SLC26A1	4	962865	1
ENSG00000127415	IDUA	4	970785	1
ENSG00000127418	FGFRL1	4	994940	1
ENSG00000215367	RNF212	4	1099048	2
ENSG00000159692	CTBP1	4	1195228	1
ENSG00000163945	NP_065945.1	4	1331054	1
ENSG00000179979	CRIPAK	4	1377833	3
ENSG00000174137	FAM53A	4	1611607	1
ENSG00000068078	FGFR3	4	1764832	2
ENSG00000206123	Q5BLP8_HUMAN	4	2013352	1
ENSG00000125388	GRK4	4	2935136	1
ENSG00000188981	NP_001013000.2	4	3220565	1
ENSG00000184160	ADRA2C	4	3738094	1
ENSG00000168826	ZNF509	4	4342879	1
ENSG00000168818	STX18	4	4471599	2
ENSG00000152953	STK32B	4	5104428	1
ENSG00000072832	CRMP1	4	5873393	1
ENSG00000152969	JAKMIP1	4	6106383	1
ENSG00000074211	PPP2R2C	4	6373214	1
ENSG00000013288	MAN2B2	4	6627803	1
ENSG00000109519	GRPEL1	4	7112683	2
ENSG00000184985	SORCS2	4	7245275	2
ENSG00000196526	AFAP1	4	7811342	1
ENSG00000178571	NM_203423	4	7991628	1
ENSG00000169676	DRD5	4	9392701	1
ENSG00000207716	hsa-mir-572	4	10979549	1
ENSG00000134962	KLB	4	39084868	1
ENSG00000205794	Q6ZUV0_HUMAN	4	39720932	1
ENSG00000078177	N4BP2_HUMAN	4	39734919	1
ENSG00000064042	LIMCH1	4	41057559	1
ENSG00000188848	CCDC4	4	41807714	1
ENSG00000124406	ATP8A1	4	42105151	1
ENSG00000183783	KCTD8	4	43870683	1
ENSG00000109158	GABRA4	4	46615676	1
ENSG00000128045	RASL11B	4	53423241	1
ENSG00000128052	KDR	4	55639416	1
ENSG00000109265	NP_065773.1	4	56859153	1
ENSG00000196503	ARL9	4	57066132	1
ENSG00000171476	HOP_HUMAN	4	57208921	2
ENSG00000132463	GRSF1	4	71903957	1
ENSG00000124875	CXCL6	4	74921277	1
ENSG00000189157	Q6ZV65_HUMAN	4	77354217	1
ENSG00000138771	SHROOM3	4	77575277	1
ENSG00000152795	HNRPDL	4	83563371	1
ENSG00000145284	SCD5	4	83769717	1
ENSG00000163629	PTPN13	4	87734909	1
ENSG00000163633	C4orf36	4	88016437	1
ENSG00000164032	H2AFZ	4	101088271	1
ENSG00000188517	COL25A1	4	109954304	1
ENSG00000170522	ELOVL6	4	111186451	1
ENSG00000164096	NP_001001701.2	4	120438239	1
ENSG00000164111	ANXA5	4	122808598	1
ENSG00000138686	BBS7	4	122965089	1
ENSG00000151014	CCRN4L	4	140156393	1
ENSG00000109436	TBC1D9	4	141761387	1
ENSG00000170153	RNF150	4	142006175	1
ENSG00000153147	SMARCA5	4	144654066	1
ENSG00000164144	ARFIP1	4	153920562	2
ENSG00000145423	SFRP2	4	154921194	1
ENSG00000109466	KLHL2	4	166348238	1
ENSG00000198948	MFAP3L	4	171144328	1
ENSG00000164107	HAND2	4	174684227	1
ENSG00000168412	MTNR1A	4	187691808	1
ENSG00000127589	TUBB4Q	4	191140672	2
ENSG00000075705	NP_001093323.1	4	191179690	4
ENSG00000205096	DUX4_HUMAN	4	191226368	5
ENSG00000205095	DUX4_HUMAN	4	191229661	4
ENSG00000212640	DUX4_HUMAN	4	191232954	5
ENSG00000212639	Q13060_HUMAN	4	191236254	5
ENSG00000178067	NM_033178.2	4	191238151	5
ENSG00000212638	DUX4	4	191242841	4
ENSG00000205094	DUX4	4	191246141	4
ENSG00000153404	NP_443141.3	5	193373	2
ENSG00000164366	CCDC127	5	257875	1
ENSG00000063438	PDCD6	5	324736	3
ENSG00000066230	SLC9A3	5	526425	2
ENSG00000171368	TPPP	5	713891	3
ENSG00000206078	Q6P7N6_HUMAN	5	720759	1
ENSG00000145506	NKD2	5	1062077	1
ENSG00000113504	SLC12A7	5	1103500	2
ENSG00000174358	SLC6A19	5	1254710	1
ENSG00000164362	TERT	5	1306289	4
ENSG00000153395	AYTL2	5	1514544	1
ENSG00000170561	IRX2	5	2799880	2
ENSG00000186493	C5orf38	5	2805258	1
ENSG00000170549	IRX1	5	3649168	2
ENSG00000150753	CCT5	5	10303282	1
ENSG00000145555	MYO10	5	16718413	1
ENSG00000113389	NPR3	5	32747422	1
ENSG00000182631	RXFP3	5	33972246	1
ENSG00000168621	GDNF	5	37848536	1
ENSG00000132356	PRKAA1	5	40795238	1
ENSG00000178996	SNAG1	5	53849350	1
ENSG00000152670	DDX4	5	55069609	1
ENSG00000134352	IL6ST	5	55266680	1
ENSG00000095015	MAP3K1	5	56147158	1
ENSG00000049167	ERCC8	5	60205415	1
ENSG00000164182	NDUFA12L	5	60276744	1
ENSG00000086189	DIMT1L	5	61720108	1
ENSG00000086200	IPO11	5	61744351	1
ENSG00000178394	HTR1A	5	63292034	1
ENSG00000197822	OCLN	5	68823875	2
ENSG00000083312	TNPO1	5	72148171	1
ENSG00000145703	IQGAP2	5	75734905	1
ENSG00000189127	NP_001004441.1	5	79888331	1
ENSG00000113319	RASGRF2	5	80292314	2
ENSG00000113356	POLR3G	5	89806437	1
ENSG00000113369	ARRDC3	5	90700299	1
ENSG00000205359	SLCO6A1	5	101735553	1
ENSG00000145723	GIN1	5	102449603	1
ENSG00000145743	FBXL17	5	107223348	1
ENSG00000198961	PJA2	5	108698309	1
ENSG00000152495	CAMK4	5	110587981	1
ENSG00000170238	Q9NUN8_HUMAN	5	111783179	1
ENSG00000171444	MCC	5	112389428	1
ENSG00000080709	KCNN2	5	113725565	1
ENSG00000152503	TRIM36	5	114488377	1
ENSG00000145780	FEM1C	5	114884507	1
ENSG00000145782	ATG12	5	115193714	1
ENSG00000177879	AP3S1	5	115205239	1
ENSG00000172901	LAEVR_HUMAN	5	115326170	1
ENSG00000092421	SEMA6A	5	115807247	1
ENSG00000168938	PPIC	5	122386979	1
ENSG00000145794	MEGF10	5	126654514	1
ENSG00000158985	CDC42SE2	5	130627601	1
ENSG00000158987	FNIP1	5	130775086	1
ENSG00000205089	NP_001034869.1	5	132111036	2
ENSG00000198944	ANKRD43	5	132176932	1
ENSG00000113575	PPP2CA	5	133560047	1
ENSG00000043143	PHF15	5	133889246	1
ENSG00000132570	PCBD2	5	134268729	1
ENSG00000069011	PITX1	5	134391368	2
ENSG00000113648	H2AFY	5	134697970	1
ENSG00000152377	SPOCK1	5	136338886	1
ENSG00000044115	CTNNA1	5	138117006	1
ENSG00000183403	DND1	5	140030568	1
ENSG00000204970	PCDHA1	5	140146060	1
ENSG00000204969	PCDHA2	5	140154628	4
ENSG00000204968	PCDHA3	5	140160967	2
ENSG00000204967	PCDHA4	5	140166856	4
ENSG00000204965	PCDHA5	5	140181545	2
ENSG00000204964	PCDHA6	5	140187834	3
ENSG00000204963	PCDHA7	5	140194153	1
ENSG00000204962	PCDHA8	5	140201091	1
ENSG00000204961	PCDHA9	5	140207541	3
ENSG00000081842	PCDHAC2	5	140215818	2
ENSG00000214608	PCDHA11	5	140228015	2
ENSG00000214600	PCDHA12	5	140235115	2
ENSG00000112852	PCDHB2	5	140454421	5
ENSG00000113205	PCDHB3	5	140460418	4
ENSG00000081818	PCDHB4	5	140481765	5
ENSG00000113209	PCDHB5	5	140495133	4
ENSG00000113211	PCDHB6	5	140510023	3
ENSG00000113212	PCDHB7	5	140532519	4
ENSG00000120322	PCDHB8	5	140537614	4
ENSG00000196963	PCDHB16	5	140541164	4
ENSG00000177839	NM_019119.3	5	140547077	3
ENSG00000120324	PCDHB9	5	140552136	5
ENSG00000197479	PCDHB11	5	140559482	5
ENSG00000120328	PCDHB12	5	140568475	4
ENSG00000187372	PCDHB13	5	140573722	2
ENSG00000120327	PCDHB14	5	140583130	4
ENSG00000146001	PCDHB18	5	140594122	4
ENSG00000113248	PCDHB15	5	140605165	4
ENSG00000120329	SLC25A2	5	140662381	1
ENSG00000178913	TAF7	5	140678239	1
ENSG00000204956	PCDHGA1	5	140690388	1
ENSG00000204955	PCDHGA2	5	140698538	5
ENSG00000214594	PCDHGA3	5	140703619	5
ENSG00000214580	PCDHGA6	5	140733665	5
ENSG00000214574	PCDHGA8	5	140751667	5
ENSG00000214570	PCDHGB7	5	140777466	4
ENSG00000214567	PCDHGA11	5	140780721	4
ENSG00000081853	PCDHGC5	5	140790342	4
ENSG00000131504	DIAPH1	5	140874767	2
ENSG00000113580	NR3C1	5	142637689	2
ENSG00000157510	AFAP1L1	5	148631651	1
ENSG00000132912	DCTN4	5	150068503	1
ENSG00000055147	C5orf3	5	153351464	1
ENSG00000037749	MFAP3	5	153398752	1
ENSG00000113196	HAND1	5	153834726	1
ENSG00000155506	LARP1	5	154072655	2
ENSG00000039600	SOX30	5	156985265	1
ENSG00000155858	LSM11	5	157103337	1
ENSG00000135083	CCNJL	5	159611238	1
ENSG00000184347	SLIT3	5	168025857	1
ENSG00000164438	TLX3	5	170668893	1
ENSG00000072803	FBXW11	5	171221161	1
ENSG00000174705	SH3PXD2B	5	171693108	1
ENSG00000204758	Q6ZUG4_HUMAN	5	172314763	1
ENSG00000037241	RPL26L1	5	172319045	1
ENSG00000164466	SFXN1	5	174838189	1
ENSG00000169258	GPRIN1	5	175955409	1
ENSG00000087206	UIMC1	5	176264612	1
ENSG00000213347	MXD3	5	176666830	1
ENSG00000183258	DDX41	5	176871185	1
ENSG00000197451	HNRPAB	5	177564114	1
ENSG00000050767	COL23A1	5	177597225	2
ENSG00000087116	ADAMTS2	5	178473457	2
ENSG00000161013	MGAT4B	5	179156711	1
ENSG00000146090	RASGEF1C	5	179460397	1
ENSG00000137265	IRF4	6	336760	1
ENSG00000112685	EXOC2	6	430139	3
ENSG00000137273	FOXF2	6	1335068	1
ENSG00000137275	RIPK1	6	3013740	3
ENSG00000205410	Q6ZS46_HUMAN	6	7052562	1
ENSG00000124782	RREB1	6	7052829	2
ENSG00000096696	DSP	6	7486869	1
ENSG00000197977	ELOVL2	6	11088981	1
ENSG00000145979	TBC1D7	6	13413165	1
ENSG00000145990	GFOD1	6	13466041	1
ENSG00000187461	C6orf114	6	13577492	1
ENSG00000007944	MYLIP	6	16237296	1
ENSG00000124788	ATXN1	6	16407320	1
ENSG00000112183	RBM24	6	17389792	1
ENSG00000172201	ID4	6	19945596	1
ENSG00000111802	TTRAP	6	24758185	1
ENSG00000164508	HIST1H2AA	6	25834339	1
ENSG00000204590	GNL1	6	30621675	1
ENSG00000204576	PRR3	6	30632735	1
ENSG00000137337	MDC1	6	30775563	1
ENSG00000137331	NP_003888.2	6	30818955	1
ENSG00000204438	BAT4	6	31736985	1
ENSG00000204435	LY6G5B	6	31740992	1
ENSG00000204390	HSPA1L	6	31885375	1
ENSG00000204389	HSP71_HUMAN	6	31891299	1
ENSG00000204387	C6orf48	6	31910383	1
ENSG00000204348	DOM3Z	6	32045566	1
ENSG00000204344	STK19	6	32046931	1
ENSG00000204301	NOTCH4	6	32270599	1
ENSG00000204231	RXRB	6	33269343	1
ENSG00000204218	RGL2	6	33367416	1
ENSG00000204210	ZBT22_HUMAN	6	33390174	1
ENSG00000112664	NUDT3	6	34363982	1
ENSG00000064999	ANKS1A	6	34965019	1
ENSG00000065029	ZNF76	6	35335427	1
ENSG00000137409	MTCH1	6	37043896	1
ENSG00000146192	FGD2	6	37081400	1
ENSG00000137193	PIM1	6	37245943	1
ENSG00000112139	MDGA1	6	37708262	1
ENSG00000112167	C6orf64	6	39179818	1
ENSG00000124780	KCNK17	6	39374756	1
ENSG00000137166	FOXP4	6	41622142	2
ENSG00000112559	MDFI	6	41712784	1
ENSG00000112576	CCND3	6	42010650	1
ENSG00000124702	KLHDC3	6	43089955	1
ENSG00000171467	ZNF318	6	43407491	1
ENSG00000171462	DLK2	6	43526068	1
ENSG00000178233	C6orf137	6	44346458	1
ENSG00000214666	Q6ZT78_HUMAN	6	44346871	1
ENSG00000146072	TNFRSF21	6	47307228	1
ENSG00000135312	HTR1B	6	78228641	1
ENSG00000164414	SLC35A1	6	88239414	1
ENSG00000112159	MDN1	6	90409952	1
ENSG00000184486	POU3F2	6	99389301	1
ENSG00000112249	ASCC3	6	101062791	1
ENSG00000112320	SOBP	6	107918010	1
ENSG00000155130	MARCKS	6	114285249	1
ENSG00000189241	TSPYL1	6	116704434	1
ENSG00000111879	C6orf60	6	119322697	2
ENSG00000118518	RNF146	6	127629448	1
ENSG00000189367	KIAA0408	6	127803181	2
ENSG00000214338	C6orf174	6	127813023	3
ENSG00000152894	PTPRK	6	128331627	1
ENSG00000164484	KIAA1913	6	130728572	1
ENSG00000079819	EPB41L2	6	131202180	1
ENSG00000112282	MED23	6	131936801	1
ENSG00000112319	EYA4	6	133604188	1
ENSG00000169976	SF3B5	6	144457711	1
ENSG00000135604	STX11	6	144513362	2
ENSG00000112425	EPM2A	6	145988141	2
ENSG00000131016	AKAP12	6	151603202	1
ENSG00000164694	FNDC1	6	159510412	1
ENSG00000146453	PNLDC1	6	160141291	1
ENSG00000175003	SLC22A1	6	160462853	1
ENSG00000185345	PARK2	6	161688442	1
ENSG00000060762	BRP44L	6	166698397	1
ENSG00000026297	RNASET2	6	167263003	2
ENSG00000146521	C6orf123	6	167928072	1
ENSG00000188427	Q6ZUY9_HUMAN	6	167939059	1
ENSG00000198221	C6orf124	6	167967419	2
ENSG00000112562	SMOC2	6	168584680	1
ENSG00000112584	FAM120B	6	170457769	1
ENSG00000177706	FAM20C	7	288052	4
ENSG00000188191	PRKAR1B	7	555913	1
ENSG00000164818	HEATR2	7	732864	4
ENSG00000206016	Q6ZS67_HUMAN	7	788263	4
ENSG00000164828	UNC84A	7	822778	1
ENSG00000105972	C7orf20	7	882717	1
ENSG00000105963	CENTA1	7	904066	1
ENSG00000146540	C7orf50	7	1003148	5
ENSG00000164850	GPER	7	1092969	2
ENSG00000178381	ZFAND2A	7	1159069	1
ENSG00000106266	SNX8	7	2261167	3
ENSG00000136213	CHST12	7	2409749	2
ENSG00000146555	SDK1	7	3307745	1
ENSG00000164916	FOXK1	7	4688456	1
ENSG00000136247	ZDHHC4	7	6583609	1
ENSG00000146576	C7orf26	7	6596301	1
ENSG00000205903		7	6648566	1
ENSG00000187953	NR_002217.1	7	6716280	1
ENSG00000105866	SP4	7	21434192	1
ENSG00000136231	IGF2BP3	7	23316354	1
ENSG00000070882	OSBPL3	7	24802691	1
ENSG00000122566	HNRNPA2B1	7	26197992	1
ENSG00000122565	CBX3	7	26207307	1
ENSG00000153807	HOXA10	7	27176736	2
ENSG00000212771		7	32734377	1
ENSG00000205763	NR_003500.1	7	32922952	1
ENSG00000122643	NT5C3	7	33020267	1
ENSG00000122507	BBS9	7	33040555	1
ENSG00000164542	NP_001093895.1	7	36330364	1
ENSG00000011426	ANLN	7	36395957	1
ENSG00000106483	SFRP4	7	37912247	1
ENSG00000175600	Q4KMW4_HUMAN	7	40141100	1
ENSG00000106588	PSMA2	7	42922989	1
ENSG00000106603	C7orf44	7	43637276	1
ENSG00000015676	NUDCD3	7	44388408	1
ENSG00000196262	PPIA	7	44802803	1
ENSG00000132434	LANCL2	7	55400635	1
ENSG00000188639	LOC100128323	7	56839246	4
ENSG00000164669	Q96LV5_HUMAN	7	64239038	2
ENSG00000133375	Q06976_HUMAN	7	65607600	1
ENSG00000179342		7	65608016	1
ENSG00000154710	KCTD7	7	65731380	2
ENSG00000158321	AUTS2	7	68702576	1
ENSG00000146755	TRIM50	7	72364471	1
ENSG00000188763	FZD9	7	72486045	1
ENSG00000178809	TRIM73	7	74862839	1
ENSG00000146707	POMZP3	7	76077243	1
ENSG00000187391	MAGI2	7	77484310	1
ENSG00000135185	C7orf23	7	86663412	2
ENSG00000075142	SRI	7	87672371	1
ENSG00000157240	FZD1	7	90731719	1
ENSG00000105829	BET1	7	93430021	1
ENSG00000166448	TMEM130	7	98282050	1
ENSG00000106245	BUD31	7	98844537	1
ENSG00000197343	ZNF655	7	98993981	1
ENSG00000214309	NP_981942.1	7	99562253	1
ENSG00000160844	NP_849153.3	7	99636219	1
ENSG00000172354	GNB2	7	100109311	1
ENSG00000146828	SLC12A9	7	100288294	1
ENSG00000205267	Q6IED9_HUMAN	7	100631814	1
ENSG00000128563	PRKRIP1	7	101791064	1
ENSG00000214243	Q7LCM6_HUMAN	7	101791064	1
ENSG00000160993	ALKBH4	7	101883702	1
ENSG00000161036	NP_690852.1	7	101892385	1
ENSG00000214242	Q8IV37_HUMAN	7	101907433	2
ENSG00000170667	RASL2_HUMAN	7	101910974	1
ENSG00000205236	NP_116581.3	7	102064710	1
ENSG00000170615	SLC26A5	7	102780413	1
ENSG00000091127	PUS7	7	104884194	1
ENSG00000091136	LAMB1	7	107351484	1
ENSG00000177683	THAP5	7	107991768	1
ENSG00000128590	DNAJB9	7	107997592	1
ENSG00000105971	CAV2	7	115926532	1
ENSG00000198898	CAPZA2	7	116289799	1
ENSG00000170775	GPR37	7	124173352	1
ENSG00000197157	SND1	7	127079438	1
ENSG00000178193	Q8NBE0_HUMAN	7	128289741	1
ENSG00000128524	ATP6V1F	7	128290116	1
ENSG00000212825	NR_002144.1	7	128553605	2
ENSG00000106484	MEST	7	129913282	1
ENSG00000106554	CHCHD3	7	132120164	1
ENSG00000164898	C7orf55	7	138676614	1
ENSG00000176510	Q8NH08_HUMAN	7	142918148	1
ENSG00000196511	TPK1	7	143779976	1
ENSG00000197362	ZNF786	7	148088984	1
ENSG00000155660	PDIA4	7	148331098	1
ENSG00000170265	ZNF282	7	148523487	1
ENSG00000181220	ZNF746	7	148800820	1
ENSG00000133619	KRBA1	7	149043081	1
ENSG00000181444	ZNF467	7	149092388	2
ENSG00000033100	CHGUT_HUMAN	7	150560518	1
ENSG00000213188	LOC100131012	7	151455992	3
ENSG00000130675	MNX1	7	156490308	2
ENSG00000155093	PTPRN2	7	157024516	5
ENSG00000104714	ERICH1	8	604201	4
ENSG00000198010	DLGAP2	8	1436939	3
ENSG00000213010	CH061_HUMAN	8	1720281	2
ENSG00000104728	ARHGEF10	8	1759549	2
ENSG00000176305	CLDN23	8	8597319	2
ENSG00000147324	MFHAS1	8	8679409	1
ENSG00000173273	TNKS	8	9450855	1
ENSG00000104219	ZDHHC2	8	17058402	1
ENSG00000168453	HR	8	22027877	1
ENSG00000104689	TNFRSF10A	8	23104916	1
ENSG00000012232	EXTL3	8	28615050	1
ENSG00000157168	NRG1	8	32525295	1
ENSG00000187840	EIF4EBP1	8	38007177	1
ENSG00000077782	FGFR1	8	38387813	1
ENSG00000185900	SG196_HUMAN	8	43067818	1
ENSG00000023287	RB1CC1	8	53697569	1
ENSG00000147509	RGS20	8	54926921	1
ENSG00000164736	SOX17	8	55533048	1
ENSG00000008988	RPS20	8	57148169	1
ENSG00000169122	FAM110B	8	59069667	1
ENSG00000198846	TOX	8	59880531	2
ENSG00000137563	GGH	8	64090197	1
ENSG00000164764	NP_694957.2	8	74141809	1
ENSG00000205178	LOC392242	8	86742206	3
ENSG00000205175	REXO1L3P	8	86754114	4
ENSG00000205173	REXO1L1	8	86760951	3
ENSG00000205170	REXO1L4P	8	86859937	3
ENSG00000205168	REXO1L5P	8	86872128	4
ENSG00000205166	REXO1L1	8	86884318	4
ENSG00000205164	REXO1L6P	8	86896232	3
ENSG00000205162	REXO1L7P	8	86908422	4
ENSG00000147613	PSKH2	8	87129718	1
ENSG00000176566	WDR21C	8	88954128	1
ENSG00000156466	GDF6	8	97223736	1
ENSG00000156486	KCNS2	8	99508426	1
ENSG00000164920	OSR2	8	100025846	1
ENSG00000164924	YWHAZ	8	101999980	1
ENSG00000104517	UBR5	8	103334748	1
ENSG00000164929	BAALC	8	104222097	1
ENSG00000164933	SLC25A32	8	104480045	1
ENSG00000164934	WDSOF1	8	104496118	1
ENSG00000120526	NUDCD1	8	110322325	2
ENSG00000147642	SYBU_HUMAN	8	110655593	1
ENSG00000136999	NOV	8	120497882	1
ENSG00000156804	FBXO32	8	124584540	1
ENSG00000155897	ADCY8	8	131861736	1
ENSG00000167632	NP_113654.3	8	140811770	2
ENSG00000022567	SLC45A4	8	142290052	2
ENSG00000204882	GPR20	8	142435767	1
ENSG00000171045	TSNARE1	8	143291349	3
ENSG00000180155	LYNX1	8	143842762	1
ENSG00000214749	Q6ZT75_HUMAN	8	143849617	1
ENSG00000214747	Q8N7P7_HUMAN	8	144224399	2
ENSG00000176956	LY6H	8	144310709	1
ENSG00000181638	ZFP41	8	144400484	4
ENSG00000180921	FAM83H	8	144878091	1
ENSG00000178209	PLEC1	8	145061309	4
ENSG00000178814	OPLAH	8	145178156	1
ENSG00000179698		8	145234617	1
ENSG00000173137	ADCK5	8	145568539	1
ENSG00000071894	CPSF1	8	145589254	2
ENSG00000213563	NP_001001795.1	8	145722412	1
ENSG00000147799	K1688_HUMAN	8	145725371	1
ENSG00000161016	RPL8	8	145985958	1
ENSG00000107104	ANKRD15	9	460291	2
ENSG00000137090	DMRT1	9	831690	1
ENSG00000168263	KCNV2	9	2707526	1
ENSG00000120210	INSL6	9	5153793	1
ENSG00000178445	GLDC	9	6522469	1
ENSG00000164975	SNAPC3	9	15412732	1
ENSG00000171843	MLLT3	9	20335074	1
ENSG00000137073	UBAP2	9	33911691	1
ENSG00000164976	KIAA1161	9	34358908	2
ENSG00000137094	DNAJB5	9	34979742	1
ENSG00000165280	VCP	9	35046561	1
ENSG00000005238	KIAA1539	9	35094109	1
ENSG00000137076	TLN1	9	35687336	1
ENSG00000107175	CREB3	9	35722317	1
ENSG00000213866		9	35961341	1
ENSG00000196092	PAX5	9	36828539	1
ENSG00000180071	ANKRD18A	9	38530566	1
ENSG00000183148	ANKRD20A2	9	42358299	1
ENSG00000187559	FOXD4L3	9	70107603	1
ENSG00000107242	PIP5K1B	9	70510436	1
ENSG00000107282	APBA1	9	71235022	2
ENSG00000107372	ZFAND5	9	74159194	1
ENSG00000156049	GNA14	9	79228369	1
ENSG00000165118	C9orf64	9	85743049	1
ENSG00000165119	HNRPK	9	85772912	1
ENSG00000178966	RMI1	9	85785533	1
ENSG00000148053	NTRK2	9	86473286	2
ENSG00000214888	Q5PR19_HUMAN	9	89563922	1
ENSG00000130045	NXNL2	9	90339840	1
ENSG00000169071	ROR2	9	93365194	1
ENSG00000165233	C9orf89	9	94898248	1
ENSG00000165140	FBP1	9	96405244	1
ENSG00000185920	PTCH1	9	97245083	1
ENSG00000178919	FOXE1	9	99655358	1
ENSG00000136826	KLF4	9	109286954	1
ENSG00000119326	CTNNAL1	9	110744672	1
ENSG00000106853	LTB4DH	9	113365074	1
ENSG00000095397	DFNB31	9	116204181	1
ENSG00000119402	FBXW2	9	122559075	1
ENSG00000136848	DAB2IP	9	123368983	1
ENSG00000106689	LHX2	9	125813710	1
ENSG00000136950	ARPC5L	9	126664230	1
ENSG00000119487	MAPKAP1	9	127239494	1
ENSG00000106976	DNM1	9	130005484	1
ENSG00000167123	CEECAM1	9	130213866	1
ENSG00000119335	SET	9	130485996	1
ENSG00000136802	LRRC8A	9	130684268	2
ENSG00000148343	FAM73B	9	130838745	1
ENSG00000130723	KIAA0515	9	133259421	1
ENSG00000196358	NTNG2	9	134027155	1
ENSG00000148248	SURF4	9	135206666	1
ENSG00000198870	C9orf96	9	135233105	1
ENSG00000160326	SLC2A6	9	135326038	1
ENSG00000160293	VAV2	9	135616837	2
ENSG00000186459		9	137290333	2
ENSG00000165661	QSOX2	9	137879493	2
ENSG00000148411	BTBD14A	9	138038204	1
ENSG00000165688	PMPCA	9	138424931	1
ENSG00000148400	NOTCH1	9	138508717	2
ENSG00000169692	AGPAT2	9	138687416	1
ENSG00000213213	TMEM141	9	138805624	2
ENSG00000196642	KIAA1984	9	138822195	3
ENSG00000159069	FBXW5	9	138954709	2
ENSG00000214402	NP_997393.3	9	138996177	1
ENSG00000107331	ABCA2	9	139021507	1
ENSG00000197355	UAP1L1	9	139092006	1
ENSG00000176248	ANAPC2	9	139189057	1
ENSG00000196435	RNF208	9	139234528	1
ENSG00000198113	C9orf167	9	139292099	1
ENSG00000187609	NP_060290.3	9	139321178	1
ENSG00000214358	Q9NX53_HUMAN	9	139406076	1
ENSG00000181090	EHMT1	9	139711440	2
ENSG00000148408	CACNA1B	9	139892062	1
ENSG00000015171	ZMYND11	10	170643	1
ENSG00000151240	DIP2C	10	311432	3
ENSG00000205740	Q6ZNQ2_HUMAN	10	1007097	1
ENSG00000185736	ADARB2	10	1218073	4
ENSG00000067057	PFKP	10	3099712	2
ENSG00000196372	ASB13	10	5714923	1
ENSG00000108021	C10orf18	10	5766807	1
ENSG00000107485	GATA3	10	8136673	1
ENSG00000152455	SUV39H2	10	14960868	1
ENSG00000152457	DCLRE1C	10	14981169	1
ENSG00000165995	CACNB2	10	18469672	1
ENSG00000077327	SPAG6	10	22674405	1
ENSG00000120616	EPC1	10	32596694	1
ENSG00000099250	NRP1	10	33506426	3
ENSG00000108094	CUL2	10	35337485	2
ENSG00000189180	ZNF33A	10	38339578	1
ENSG00000165731	RET	10	42892523	1
ENSG00000012779	ALOX5	10	45189635	1
ENSG00000215136	Q59H13_HUMAN	10	45189635	1
ENSG00000165406	39508	10	45272823	1
ENSG00000183675	PTPN20B	10	48357046	1
ENSG00000165606	DRGX	10	50242243	1
ENSG00000070748	CHAT	10	50487147	1
ENSG00000187714	SLC18A3	10	50488427	1
ENSG00000185532	PRKG1	10	52421124	1
ENSG00000171988	JMJD1C	10	64596987	1
ENSG00000165476	REEP3	10	64951179	1
ENSG00000099282	TSPAN15	10	70881232	1
ENSG00000197467	COL13A1	10	71231650	1
ENSG00000148730	EIF4EBP2	10	71833928	1
ENSG00000122863	CHST3	10	73394126	1
ENSG00000148719	DNAJB12	10	73762594	1
ENSG00000122884	P4HA1	10	74436981	1
ENSG00000156671	SAMD8	10	76541313	2
ENSG00000165655	ZNF503	10	76827925	1
ENSG00000156113	KCNMA1	10	78307361	1
ENSG00000182771	GRID1	10	87349292	1
ENSG00000148672	GLUDP5	10	88800227	2
ENSG00000026103	FAS	10	90739206	1
ENSG00000152779	SLC16A12	10	91180340	1
ENSG00000187553	CYP26C1	10	94810555	1
ENSG00000165879	FRAT1	10	99069088	1
ENSG00000181274	FRAT2	10	99082244	1
ENSG00000119919	NKX2-3	10	101282700	1
ENSG00000075891	PAX2	10	102495322	1
ENSG00000107815	PEO1	10	102737302	1
ENSG00000107821	KAZALD1	10	102811588	1
ENSG00000166167	BTRC	10	103103815	1
ENSG00000107833	NPM3	10	103531073	1
ENSG00000198408	MGEA5	10	103534199	1
ENSG00000148840	PPRC1	10	103882777	1
ENSG00000166197	NOLC1	10	103902107	1
ENSG00000107859	PITX3	10	103979936	2
ENSG00000138107	ACTR1A	10	104228977	1
ENSG00000185933	FAM26C	10	105203134	1
ENSG00000156384	C10orf78	10	105871806	1
ENSG00000187164	KIAA1598	10	118605750	1
ENSG00000148908	RGS10	10	121249330	1
ENSG00000107651	SEC23IP	10	121642213	1
ENSG00000138162	TACC2	10	123738699	2
ENSG00000065154	OAT	10	126075869	1
ENSG00000175029	CTBP2	10	126666894	1
ENSG00000188722		10	129424313	1
ENSG00000186766	FOXI2	10	129425504	1
ENSG00000165752	STK32C	10	133870986	1
ENSG00000148814	LRRC27	10	133995648	1
ENSG00000068383	INPP5A	10	134201343	2
ENSG00000197177	GPR123	10	134734423	2
ENSG00000198546	ZNF511	10	134972395	1
ENSG00000130643	DRD1IP	10	134988922	1
ENSG00000203771	DUX-like	10	135330645	5
ENSG00000203770	DUX-like	10	135333955	5
ENSG00000203769	DUX-like	10	135337264	4
ENSG00000203768	DUX1	10	135340563	5
ENSG00000203767	DUX-like	10	135343873	5
ENSG00000203766	DUX-like	10	135347172	5
ENSG00000185101	TMEM16J	11	407938	1
ENSG00000174915	PTDSS2	11	440280	2
ENSG00000185507	IRF7	11	602555	1
ENSG00000215211	SCT	11	617013	2
ENSG00000177106	EPS8L2	11	696113	2
ENSG00000177666	PNPLA2	11	808902	2
ENSG00000177830	CHID1	11	858396	1
ENSG00000078902	TOLLIP	11	1252178	1
ENSG00000174672	BRSK2	11	1367705	1
ENSG00000183734	ASCL2	11	2246305	1
ENSG00000212791	Q8WZ58_HUMAN	11	2248315	2
ENSG00000053918	KCNQ1	11	2422797	1
ENSG00000129749	CHRNA10	11	3643394	1
ENSG00000166313	APBB1	11	6360165	1
ENSG00000166311	SMPD1	11	6368231	1
ENSG00000166341	DCHS1	11	6599134	1
ENSG00000170748	RBMXL2	11	7066859	2
ENSG00000175356	SCUBE2	11	8998511	2
ENSG00000133789	SWP70_HUMAN	11	9642204	1
ENSG00000129586	ZBED5	11	10830921	1
ENSG00000110328	GALNTL4	11	11248997	1
ENSG00000133794	ARNTL	11	13255901	1
ENSG00000166689	PLEKHA7	11	16765791	1
ENSG00000006071	ABCC8	11	17371008	1
ENSG00000129159	KCNC1	11	17714090	1
ENSG00000166788	SAAL1	11	18058469	1
ENSG00000109851	DBX1	11	20134336	1
ENSG00000165973	NELL1	11	20647712	1
ENSG00000171714	TMEM16E	11	22171298	1
ENSG00000007372	PAX6	11	31766868	1
ENSG00000184937	WT1	11	32365897	1
ENSG00000179431	NM_014344.2	11	35596761	1
ENSG00000149084	HSD17B12	11	43658835	1
ENSG00000121653	MAPK8IP1	11	45863778	1
ENSG00000149091	DGKZ	11	46311315	1
ENSG00000213619	NDUFS3	11	47557192	1
ENSG00000172247	C1QTNF4	11	47567792	1
ENSG00000109920	FNBP4	11	47694646	1
ENSG00000149177	PTPRJ	11	47958689	1
ENSG00000149150	SLC43A1	11	57008586	1
ENSG00000211450	C11orf31	11	57265644	1
ENSG00000149485	FADS3	11	61323679	2
ENSG00000134824	FADS2	11	61340334	1
ENSG00000185670	ZBTB3	11	61931800	1
ENSG00000185085	INTS5	11	62170897	1
ENSG00000162227	TAF6L	11	62295451	1
ENSG00000133315	MACROD1	11	63522607	2
ENSG00000126500	FLRT1	11	63627817	2
ENSG00000149782	PLCB3	11	63775623	1
ENSG00000182450	KCNK4	11	63815369	1
ENSG00000162302	RPS6KA4	11	63883201	1
ENSG00000133895	MEN1	11	64327564	1
ENSG00000173442	EHBP1L1	11	65100388	1
ENSG00000213445	SIPA1	11	65109442	1
ENSG00000172818	OVOL1	11	65311105	1
ENSG00000172500	FIBP	11	65407787	1
ENSG00000175550	DRAP1	11	65443304	1
ENSG00000174903	RAB1C	11	65777735	2
ENSG00000174996	KLC2	11	65781766	2
ENSG00000182791	CCDC87	11	66114513	1
ENSG00000173992	CCS	11	66117245	1
ENSG00000173227	SYT12	11	66530825	1
ENSG00000175482	POLD4	11	66875597	1
ENSG00000110090	CPT1A	11	68278666	1
ENSG00000110092	CCND1	11	69165054	1
ENSG00000162105	SHANK2	11	69991609	1
ENSG00000165462	PHOX2A	11	71627772	1
ENSG00000162129	CLPB	11	71681122	1
ENSG00000110237	ARHGEF17	11	72697317	1
ENSG00000149243	NP_001034637.1	11	74811088	1
ENSG00000158636	C11orf30	11	75833717	1
ENSG00000198488	B3GNT6	11	76423083	2
ENSG00000074201	CLNS1A	11	77004847	1
ENSG00000048649	RSF1	11	77054923	1
ENSG00000134640	MTNR1B	11	92342437	1
ENSG00000149212	SESN3	11	94545781	1
ENSG00000087053	MTMR2	11	95205694	1
ENSG00000110330	BIRC2	11	101723176	1
ENSG00000179331	RAB39	11	107304487	1
ENSG00000149311	ATM	11	107598769	1
ENSG00000137727	ARHGAP20	11	109952976	1
ENSG00000204381	LAYN	11	110916443	2
ENSG00000109906	ZBTB16	11	113435525	1
ENSG00000180425	C11orf71	11	113767380	1
ENSG00000182985	CADM1	11	114550237	1
ENSG00000137700	SLC37A4	11	118400276	1
ENSG00000109929	SC5DL	11	120668598	1
ENSG00000149548	CCDC15	11	124329227	1
ENSG00000149557	FEZ1	11	124809211	2
ENSG00000185409	Q8IYB0_HUMAN	11	124870320	2
ENSG00000134910	STT3A	11	124967963	2
ENSG00000064309	CDON	11	125331926	1
ENSG00000151702	FLI1	11	128069199	1
ENSG00000149418	ST14	11	129534892	1
ENSG00000120451	SNX19	11	130250985	1
ENSG00000183715	OPCML	11	131790085	1
ENSG00000080854	IGSF9B	11	133294144	1
ENSG00000151500	THYN1	11	133623383	1
ENSG00000149328	NP_612351.2	11	133707016	1
ENSG00000109956	B3GAT1	11	133753610	1
ENSG00000204236	Q6ZV35_HUMAN	11	134110677	1
ENSG00000004478	FKBP4	12	2774414	1
ENSG00000078246	TULP3	12	2870294	1
ENSG00000078237	C12orf5	12	4300620	1
ENSG00000111262	KCNA1	12	4889334	1
ENSG00000139190	VAMP1	12	6440603	1
ENSG00000184574	GPR92	12	6598262	1
ENSG00000111676	ATN1	12	6903887	2
ENSG00000111678	C12orf57	12	6923455	1
ENSG00000134533	RERG	12	15151985	1
ENSG00000111728	ST8SIA1	12	22245204	1
ENSG00000139160	NP_776163.1	12	31703388	1
ENSG00000188375	H3L_HUMAN	12	31835960	1
ENSG00000151746	BICD1	12	32151448	1
ENSG00000057294	PKP2	12	32834954	1
ENSG00000139174	PRICKLE1	12	41139341	1
ENSG00000134297	PLEKHA9	12	43853114	1
ENSG00000139218	SFRS2IP	12	44599181	1
ENSG00000125084	WNT1	12	47658503	2
ENSG00000135472	FAIM2	12	48546947	1
ENSG00000110911	SLC11A2	12	49661776	1
ENSG00000183283	DAZAP2	12	49918877	1
ENSG00000182544	MFSD5	12	51931704	1
ENSG00000123349	PFDN5	12	51975502	1
ENSG00000123388	HOXC11	12	52653177	1
ENSG00000135486	HNRNPA1	12	52960755	1
ENSG00000135482	ZC3H10	12	54798297	1
ENSG00000144785	TMEM4	12	54990484	1
ENSG00000196531	NACAP1	12	55380832	1
ENSG00000185633	NDUFA4L2	12	55914955	1
ENSG00000166908	PIP4K2C	12	56271324	1
ENSG00000135502	SLC26A10	12	56290368	1
ENSG00000135439	CENTG1	12	56405251	1
ENSG00000175782	SLC35E3	12	67426203	1
ENSG00000111596	CNOT2	12	68923044	1
ENSG00000111046	MYF6	12	79625583	1
ENSG00000127720	C12orf26	12	81276455	1
ENSG00000072041	SLC6A15	12	83777402	1
ENSG00000120833	SOCS2	12	92487729	1
ENSG00000111666	CHPT1	12	100615548	2
ENSG00000139351	SYCP3	12	100646557	1
ENSG00000136048	DRAM_HUMAN	12	100795236	1
ENSG00000171310	CHST11	12	103374906	1
ENSG00000151136	BTBD11	12	106236848	1
ENSG00000076248	UNG	12	108019798	1
ENSG00000204856	C12orf24	12	109390624	1
ENSG00000089225	TBX5	12	113276119	1
ENSG00000111412	C12orf49	12	115637981	1
ENSG00000135119	TMEM118	12	115660499	1
ENSG00000174989	FBXW8	12	115833144	1
ENSG00000089094	FBXL10	12	120351285	2
ENSG00000182500	ORAI1	12	120548838	1
ENSG00000130787	HIP1R	12	121885992	1
ENSG00000086598	TMED2	12	122635029	1
ENSG00000119242	CCDC92	12	122986936	1
ENSG00000196498	NCOR2	12	123374915	2
ENSG00000081760	AACS	12	124115878	1
ENSG00000139370	SLC15A4	12	127843720	1
ENSG00000204617	Q6ZUW1_HUMAN	12	127894635	1
ENSG00000151952	TMEM132D	12	128122226	2
ENSG00000198598	MMP17	12	130878891	1
ENSG00000177169	ULK1	12	130945232	1
ENSG00000185684	EP400NL	12	131134818	1
ENSG00000184967	NOC4L	12	131194946	4
ENSG00000182870	GALNT9	12	131246873	5
ENSG00000177084	POLE	12	131710421	4
ENSG00000176876	PXMP2	12	131774265	1
ENSG00000176915	KIAA0692	12	131812166	2
ENSG00000090615	GOLGA3	12	131855568	4
ENSG00000165475	CRYL1	13	19875809	1
ENSG00000172458	IL17D	13	20175479	1
ENSG00000150457	LATS2	13	20445178	1
ENSG00000205850	C1QTNF9	13	23694956	1
ENSG00000132932	ATP8A2	13	24844209	1
ENSG00000132964	CDK8	13	25726756	2
ENSG00000165556	CDX2	13	27434281	1
ENSG00000183463		13	27450261	1
ENSG00000139508	SLC46A3	13	28172220	1
ENSG00000139597	NP_001073159.1	13	31872861	1
ENSG00000139617	NP_055702.1	13	31891545	1
ENSG00000102710	FAM48A	13	36481453	2
ENSG00000102763	NP_001009814.1	13	41038961	1
ENSG00000120675	DNAJC15	13	42495362	1
ENSG00000120658	ENOX1	13	42685654	1
ENSG00000174032	SLC25A30	13	44865456	1
ENSG00000174015	SPERT	13	45174447	2
ENSG00000136156	ITM2B	13	47705307	1
ENSG00000139687	RB1	13	47775884	1
ENSG00000215462	Q86WE6_HUMAN	13	48905496	1
ENSG00000136169	SETDB2	13	48916511	1
ENSG00000102753	KPNA3	13	49171463	1
ENSG00000118946	PCDH17	13	57103790	2
ENSG00000005812	FBXL3	13	76477391	1
ENSG00000102595	UGCGL2	13	95251839	1
ENSG00000174405	LIG4	13	107657795	1
ENSG00000185950	IRS2	13	109204185	2
ENSG00000134905	CARS2	13	110091760	1
ENSG00000102606	ARHGEF7	13	110565783	1
ENSG00000126217	MCF2L	13	112604508	3
ENSG00000215362	Q96LQ9_HUMAN	13	112794931	1
ENSG00000057593	F7	13	112808106	1
ENSG00000126226	PCID2	13	112879892	1
ENSG00000184497	FAM70B	13	113599048	1
ENSG00000185989	RASA3	13	113765297	5
ENSG00000206197	NM_001013701	14	18754782	3
ENSG00000165795	NDRG2	14	20554763	1
ENSG00000165804	ZNF219	14	20628076	3
ENSG00000100813	ACIN1	14	22597616	1
ENSG00000092051	JPH4	14	23107087	1
ENSG00000136305	CIDEB	14	23844241	1
ENSG00000213906	LTB4R2	14	23848001	1
ENSG00000213903	LTB4R	14	23850545	1
ENSG00000129465	RIPK3	14	23875068	1
ENSG00000100478	AP4S1	14	30564644	1
ENSG00000100916	BRMS1L	14	35365348	1
ENSG00000136352	NKX2-1	14	36055357	1
ENSG00000136327	NKX2-8	14	36118968	1
ENSG00000212929	Q6ZVQ3_HUMAN	14	36186046	1
ENSG00000129514	FOXA1	14	37128947	1
ENSG00000165355	FBXO33	14	38936718	1
ENSG00000100442	FKBP3	14	44654584	1
ENSG00000186333	Q86SZ0_HUMAN	14	49134881	1
ENSG00000165501	PPIL5	14	49135165	1
ENSG00000165516	KLHDC2	14	49304076	1
ENSG00000100503	NIN	14	50256232	1
ENSG00000087303	NID2	14	51541271	2
ENSG00000168229	PTGDR	14	51804181	1
ENSG00000198554	WDHD1	14	54476692	1
ENSG00000180008	SOCS4	14	54563594	1
ENSG00000139977	NAT12	14	56927024	1
ENSG00000126790	C14orf149	14	59009159	1
ENSG00000139970	RTN1	14	59132447	1
ENSG00000184302	SIX6	14	60045622	1
ENSG00000100625	SIX4	14	60245999	1
ENSG00000182107	TMEM30B	14	60814159	1
ENSG00000100644	HIF1A	14	61231992	1
ENSG00000154001	PPP2R5E	14	62911108	1
ENSG00000126803	HSPA2	14	64072376	1
ENSG00000100558	PLEK2	14	66923458	1
ENSG00000100647	KIAA0247	14	69148066	1
ENSG00000100650	SFRS5	14	69303582	1
ENSG00000133985	TTC9	14	70178257	1
ENSG00000187105	HEATR4	14	73014949	1
ENSG00000184227	ACOT1	14	73073571	1
ENSG00000119718	EIF2B2	14	74539365	1
ENSG00000119638	NEK9	14	74618575	1
ENSG00000100433	KCNK10	14	87721008	1
ENSG00000070778	PTPN21	14	88003870	1
ENSG00000100722	ZC3H14	14	88099067	1
ENSG00000165521	EML5	14	88150958	1
ENSG00000042088	TDP1	14	89491999	1
ENSG00000119714	GPR68	14	90768630	1
ENSG00000100600	LGMN	14	92239910	2
ENSG00000100604	CHGA	14	92459245	2
ENSG00000100721	TCL1A	14	95246149	1
ENSG00000127152	BCL11B	14	98705377	1
ENSG00000183092	BEGAIN	14	100073243	1
ENSG00000214548	MEG3	14	100362215	1
ENSG00000214524		14	100363501	1
ENSG00000197406	DIO3	14	101097665	2
ENSG00000080824	HSP90AA2	14	101616859	1
ENSG00000205436	C14orf73	14	102636234	1
ENSG00000066735	KIF26A	14	103701972	1
ENSG00000205419	Q6ZNM3_HUMAN	14	104257731	2
ENSG00000170779	CDCA4	14	104547326	1
ENSG00000182979	MTA1	14	104957231	1
ENSG00000182809	CRIP2	14	105012176	2
ENSG00000184823		15	20709311	1
ENSG00000166206	GABRB3	15	24339786	1
ENSG00000176454	AGPAT7	15	32438381	1
ENSG00000166068	SPRED1	15	36331808	1
ENSG00000140320	BAHD1	15	38520703	1
ENSG00000137825	ITPKA	15	39573365	1
ENSG00000137802	MAPKBP1	15	39853974	1
ENSG00000103966	EHD4	15	39978933	1
ENSG00000140326	CDAN1	15	40803054	1
ENSG00000168781	HISPPD2A	15	41612952	1
ENSG00000166762	CATSPER2	15	41707993	1
ENSG00000179523	Q8TAS2_HUMAN	15	42613998	1
ENSG00000104131	EIF3J	15	42616558	1
ENSG00000171763	SPATA5L1	15	43481871	1
ENSG00000166147	FBN1	15	46487797	2
ENSG00000140284	SLC27A2	15	48261716	1
ENSG00000140262	TCF12	15	54998125	1
ENSG00000205502	NP_001007596.1	15	60243294	1
ENSG00000166128	RAB8B	15	61268781	1
ENSG00000138613	APH1B	15	61356844	1
ENSG00000103657	HERC1	15	61687871	1
ENSG00000166938	DIS3L	15	64372714	1
ENSG00000137834	SMAD6	15	64781688	1
ENSG00000188779	LBXCOR1	15	65899096	1
ENSG00000137807	KIF23	15	67493742	1
ENSG00000137818	RPLP1	15	67532177	1
ENSG00000140332	TLE3	15	68129197	1
ENSG00000140488	BRUNOL6	15	70364123	1
ENSG00000167178	ISLR2	15	72208768	1
ENSG00000178718	RPP25	15	73033810	1
ENSG00000169375	SIN3A	15	73448773	2
ENSG00000140367	UBE2Q2	15	73922855	1
ENSG00000159556	ISL2	15	74416202	2
ENSG00000140391	TSPAN3	15	75125387	1
ENSG00000169783	LINGO1	15	75692424	1
ENSG00000041357	PSMA4	15	76619824	1
ENSG00000183496	MEX3B	15	80121183	1
ENSG00000214575	CPEB1	15	81009009	1
ENSG00000169594	BNC1	15	81715659	1
ENSG00000189136	NM_207382	15	82871431	1
ENSG00000073417	PDE8A	15	83324675	1
ENSG00000140511	HAPLN3	15	87221523	1
ENSG00000140548	ZNF710	15	88345756	1
ENSG00000140553	UNC45A	15	89274414	1
ENSG00000184056	VPS33B	15	89342778	1
ENSG00000140557	ST8SIA2	15	90738144	1
ENSG00000182175	RGMA	15	91387641	1
ENSG00000213438		15	91409888	1
ENSG00000185551	NR2F2	15	94670543	2
ENSG00000182253	DMN	15	97462809	1
ENSG00000178606		15	100103645	1
ENSG00000205125		15	100111366	2
ENSG00000205124		15	100113714	2
ENSG00000205122		15	100115877	2
ENSG00000205120	LOC100132453	15	100118755	2
ENSG00000205118		15	100121138	2
ENSG00000214350		15	100121326	2
ENSG00000007384		16	48059	2
ENSG00000090565		16	415669	1
ENSG00000127578	WFIKKN1	16	620933	1
ENSG00000130731	C16orf13	16	624430	1
ENSG00000140983	RHOT2	16	658134	1
ENSG00000103254	C16orf24	16	710582	1
ENSG00000103227	TMEM112	16	843639	3
ENSG00000162009	SSTR5	16	1062757	1
ENSG00000184471	C1QTNF8	16	1078227	1
ENSG00000095917	TPSD1	16	1246061	1
ENSG00000196364		16	1247044	1
ENSG00000095906	NUBP2	16	1770657	1
ENSG00000099769	IGFALS	16	1780417	1
ENSG00000063854	HAGH	16	1799109	1
ENSG00000162040	HS3ST6	16	1901465	1
ENSG00000196408	NOXO1	16	1968920	1
ENSG00000065057	NTHL1	16	2029817	1
ENSG00000008710	PKD1	16	2078712	4
ENSG00000131653	TRAF7	16	2145800	2
ENSG00000167971	CASKIN1	16	2167185	1
ENSG00000205937	RNPS1	16	2243125	1
ENSG00000162068	NTN2L	16	2461501	2
ENSG00000185883	ATP6V0C	16	2503954	1
ENSG00000167978	SRRM2	16	2742331	1
ENSG00000162076	FLYWCH2	16	2873215	1
ENSG00000127564	PKMYT1	16	2962795	2
ENSG00000184697	CLDN6	16	3004714	1
ENSG00000006327	TNFRSF12A	16	3010343	1
ENSG00000085644	ZNF213	16	3125140	1
ENSG00000140993	TIGD7	16	3288833	1
ENSG00000167981	ZNF597	16	3426107	2
ENSG00000102858	MGRN1	16	4614854	2
ENSG00000187555	USP7	16	8894851	2
ENSG00000183454	GRIN2A	16	9754762	2
ENSG00000182108	MYLE_HUMAN	16	10930278	3
ENSG00000185338	SOCS1	16	11255775	1
ENSG00000048471	NP_001073999.2	16	12080192	1
ENSG00000183793	Q6ZMK5_HUMAN	16	14924160	3
ENSG00000179889	PDXDC1	16	14976487	1
ENSG00000214967	Q9NRE7_HUMAN	16	16322751	1
ENSG00000183458	Q6ZVJ0_HUMAN	16	16322811	4
ENSG00000205746	Q9NRE7_HUMAN	16	18319307	3
ENSG00000185984	NR_002593.1	16	21382027	1
ENSG00000140743	CDR2	16	22264758	1
ENSG00000006116	CACNG3	16	24174382	1
ENSG00000182601	HS3ST4	16	25610848	1
ENSG00000197162	ZNF688	16	30008266	2
ENSG00000169957	ZNF768	16	30442829	1
ENSG00000156853	ZNF689	16	30522203	1
ENSG00000102870	ZNF629	16	30697279	4
ENSG00000099364	FBXL19	16	30841893	1
ENSG00000177238	TRIM72	16	31024543	1
ENSG00000140682	TGFB1I1	16	31390985	1
ENSG00000180598	NP_001093157.1	16	32172145	1
ENSG00000205450	Q6PQ33_HUMAN	16	33868553	1
ENSG00000200434		16	33872927	1
ENSG00000129636	ITFG1	16	45746815	1
ENSG00000102893	PHKB	16	46052739	1
ENSG00000155393	HEATR3	16	48657382	1
ENSG00000167208	NP_878274.1	16	49257712	1
ENSG00000166188	ZNF319	16	56586074	1
ENSG00000125166	GOT2	16	57298538	1
ENSG00000089505	CMTM1	16	65143971	1
ENSG00000166595	FAM96B	16	65523467	1
ENSG00000179044	EXOC3L	16	65767008	1
ENSG00000176387	HSD11B2	16	66022537	1
ENSG00000039523	FAM65A	16	66120255	1
ENSG00000141096	DPEP3	16	66567068	1
ENSG00000102908	NFAT5	16	68156498	1
ENSG00000090857	NP_060460.3	16	68705030	1
ENSG00000157350	ST3GAL2	16	68971216	1
ENSG00000168404	MLKL	16	73263262	1
ENSG00000050820	BCAR1	16	73820429	1
ENSG00000205078		16	75797772	1
ENSG00000131149	KIAA0182	16	84204425	1
ENSG00000176692	FOXC2	16	85158427	1
ENSG00000176678	FOXL1	16	85169616	1
ENSG00000140941	MAP1LC3B	16	85982907	1
ENSG00000154118	JPH3	16	86194000	4
ENSG00000172530	BANP	16	86542539	1
ENSG00000103335	FAM38A	16	87302916	2
ENSG00000141012	GALNS	16	87407644	1
ENSG00000167515	TRAPPC2L	16	87451007	1
ENSG00000167522	ANKRD11	16	87861536	5
ENSG00000178773	CPNE7	16	88169677	2
ENSG00000131165	CHMP1A	16	88238347	3
ENSG00000181031	RPH3AL	17	62297	3
ENSG00000179409	GEMIN4	17	594614	1
ENSG00000179393	Q9NRE4_HUMAN	17	602650	2
ENSG00000167699	GLOD4	17	609442	1
ENSG00000171861	RNMTL1	17	632263	1
ENSG00000167693	NXN	17	649335	3
ENSG00000159842	ABR	17	853510	1
ENSG00000167716	WDR81	17	1566580	1
ENSG00000177374	HIC1	17	1905013	1
ENSG00000070366	SMG6	17	1909883	1
ENSG00000167720	SRR	17	2153998	1
ENSG00000167721	TSR1	17	2172742	2
ENSG00000141258	O43147-2	17	2187556	2
ENSG00000070444	MNT	17	2234105	1
ENSG00000127804	METT10D	17	2266120	1
ENSG00000083457	ITGAE	17	3564672	1
ENSG00000177602	GSG2	17	3573946	1
ENSG00000161905	ALOX15	17	4480970	1
ENSG00000161921	CXCL16	17	4583579	1
ENSG00000108556	CHRNE	17	4741840	3
ENSG00000205710	Q6ZR85_HUMAN	17	4743727	3
ENSG00000029725	RABEP1	17	5126309	1
ENSG00000072849	DERL2	17	5318337	1
ENSG00000129195	FAM64A	17	6288485	1
ENSG00000004975	DVL2	17	7069385	1
ENSG00000132507	EIF5AP1	17	7151090	2
ENSG00000174292	TNK1	17	7225134	1
ENSG00000181222	POLR2A	17	7328422	1
ENSG00000183011	LSMD1	17	7700730	1
ENSG00000196544	C17orf59	17	8033110	1
ENSG00000133026	MYH10	17	8318248	1
ENSG00000065320	NTN1	17	8865584	1
ENSG00000007237	GAS7	17	9754651	1
ENSG00000109099	PMP22	17	15073822	1
ENSG00000170160	CCDC144A	17	16534271	1
ENSG00000108551	RASD1	17	17338480	1
ENSG00000133027	PEMT	17	17349602	1
ENSG00000108557	RAI1	17	17525512	4
ENSG00000091536	MYO15A	17	17952745	3
ENSG00000177427	SMCR7	17	18104594	1
ENSG00000154898	Q8IYA2_HUMAN	17	20165069	2
ENSG00000205212	NP_001004306.1	17	20707302	2
ENSG00000184185	KCNJ12	17	21220292	1
ENSG00000109046	WSB1	17	22645233	1
ENSG00000109083	IFT20	17	23679480	1
ENSG00000004142	POLDIP2	17	23697786	1
ENSG00000160629	C17orf32	17	23708814	1
ENSG00000132589	FLOT2	17	24230479	1
ENSG00000167536	DHRS13	17	24248925	1
ENSG00000109118	PHF12	17	24256417	1
ENSG00000184060	CENTA2	17	26272880	1
ENSG00000176658	MYO1D	17	27843741	1
ENSG00000181291	TMEM132E	17	29931881	1
ENSG00000141150	RASL10B	17	31082792	1
ENSG00000108278	ZNHIT3	17	31916586	1
ENSG00000132130	LHX1	17	32368612	1
ENSG00000108296	CCDC49	17	34210973	1
ENSG00000002834	LASP1	17	34279894	1
ENSG00000141741	C17orf37	17	35138935	1
ENSG00000131759	RARA	17	35718972	1
ENSG00000171345	KRT19	17	36933396	1
ENSG00000204815	TTC25	17	37340424	1
ENSG00000177469	PTRF	17	37808001	2
ENSG00000068120	COASY	17	37967618	1
ENSG00000108861	DUSP3	17	39199016	1
ENSG00000161653	NAGS	17	39437558	1
ENSG00000141349	G6PC3	17	39503644	1
ENSG00000131094	C1QL1	17	40392588	1
ENSG00000186868	MAPT	17	41327624	1
ENSG00000214401	Q8WW58_HUMAN	17	41626716	1
ENSG00000185829	ARL17_HUMAN	17	41719640	1
ENSG00000136447	ARL17	17	41949797	2
ENSG00000189120	SP6	17	43277279	1
ENSG00000002919	SNX11	17	43539919	1
ENSG00000120068	HOXB8	17	44044708	1
ENSG00000173868	PHOSPHO1	17	44655731	1
ENSG00000064300	NGFR	17	44927654	1
ENSG00000108813	DLX4	17	45401561	1
ENSG00000011052	NME2	17	46585919	1
ENSG00000153933	DGKE	17	52266552	1
ENSG00000121057	AKAP1	17	52517552	1
ENSG00000213246	SUPT4H1	17	53777538	1
ENSG00000167434	CA4	17	55582079	1
ENSG00000170832	USP32	17	55609473	1
ENSG00000121068	TBX2	17	56832039	3
ENSG00000173826	KCNH6	17	58954427	2
ENSG00000136485	WDR68	17	58981554	1
ENSG00000087191	PSMC5	17	59258519	1
ENSG00000108604	SMARCD2	17	59263176	1
ENSG00000214174	Q96MP9_HUMAN	17	60394618	2
ENSG00000125398	SOX9	17	67628756	1
ENSG00000180616	SSTR2	17	68672755	1
ENSG00000170412	GPRC5C	17	69938647	2
ENSG00000109062	SLC9A3R1	17	70256363	1
ENSG00000172782	FADS6	17	70385076	1
ENSG00000125454	SLC25A19	17	70780669	1
ENSG00000177303	CASKIN2	17	71007938	2
ENSG00000132470	ITGB4	17	71229111	1
ENSG00000132481	TRIM47	17	71381842	1
ENSG00000141569	TRIM65	17	71396640	1
ENSG00000167880	EVPL	17	71514522	1
ENSG00000161542	PRPSAP1	17	71818610	1
ENSG00000129667	RHBDF2	17	71978571	1
ENSG00000070731	ST6GALNAC2	17	72073056	1
ENSG00000167900	TK1	17	73681776	1
ENSG00000108669	PSCD1	17	74181725	1
ENSG00000141582	CBX4	17	75421551	1
ENSG00000141564	RPTOR_HUMAN	17	76133220	3
ENSG00000175901	Q8NBT7_HUMAN	17	76617528	1
ENSG00000175866	BAIAP2	17	76623557	3
ENSG00000141577	AZI1	17	76777988	1
ENSG00000171282	BAHCC1	17	77025445	1
ENSG00000184009	ACTG1	17	77091594	1
ENSG00000169696	ASPSCR1	17	77528715	1
ENSG00000176155	CCDC57	17	77652635	1
ENSG00000141526	SLC16A3	17	77779582	1
ENSG00000141551	CSNK1D	17	77795535	3
ENSG00000141580	WDR45L	17	78165777	1
ENSG00000175711	B3GNTL1	17	78494961	3
ENSG00000177143	CETN1	18	570367	2
ENSG00000118680	NP_291024.1	18	3252123	1
ENSG00000177426	TGIF1	18	3437738	1
ENSG00000170579	DLGAP1	18	3486030	2
ENSG00000198081	ZFP161	18	5279018	1
ENSG00000082397	EPB41L3	18	5382388	1
ENSG00000176014	TUBB6	18	12298215	2
ENSG00000215527		18	12648205	1
ENSG00000101624	CEP76	18	12662632	1
ENSG00000128789	TNFSF5IP1	18	12684815	1
ENSG00000168675	C18orf1	18	13208795	5
ENSG00000134508	CABLES1	18	18969725	1
ENSG00000170558	CDH2	18	23784934	1
ENSG00000166974	MAPRE2	18	30875379	1
ENSG00000153391	C18orf37	18	31288784	1
ENSG00000141424	SLC39A6	18	31943197	1
ENSG00000152240	CCDC5	18	41938296	1
ENSG00000167216	KATNAL2	18	42780785	4
ENSG00000206183	TCEB3CL	18	42796729	4
ENSG00000206182	TCEB3C	18	42802656	4
ENSG00000183791	TCEB3CL2	18	42808571	4
ENSG00000206181	TCEB3B	18	42812941	4
ENSG00000215474	Q2VWA4_HUMAN	18	43011492	1
ENSG00000134030	KIAA0427	18	44319425	1
ENSG00000101665	SMAD7	18	44700222	1
ENSG00000176624	MEX3C	18	46954920	1
ENSG00000172175	MALT1	18	54489598	1
ENSG00000074657	ZNF532	18	54681041	1
ENSG00000141668	CBLN2	18	68354895	1
ENSG00000166342	NETO1	18	68565767	1
ENSG00000187773	C18orf51	18	70253944	1
ENSG00000166377	ATP9B	18	74930385	3
ENSG00000131196	NFATC1	18	75256760	5
ENSG00000060069	CTDP1	18	75540789	2
ENSG00000178342	KCNG2	18	75724656	1
ENSG00000129946	SHC2	19	367593	3
ENSG00000141933	C19orf20	19	458507	1
ENSG00000099804	CDC34	19	482733	1
ENSG00000099822	HCN2	19	540893	1
ENSG00000099821	POLRMT	19	568223	3
ENSG00000196614	NM_207462	19	595371	2
ENSG00000070423	RNF126	19	598530	1
ENSG00000011304	PTBP1	19	748411	2
ENSG00000129951	NP_079164.1	19	763518	2
ENSG00000175221	MED16	19	818964	1
ENSG00000182087	C19orf6	19	960650	2
ENSG00000064666	CNN2	19	977298	2
ENSG00000064932	SBNO2	19	1058658	1
ENSG00000118046	STK11	19	1156798	2
ENSG00000118050	C19orf24	19	1226520	1
ENSG00000160953	MUM1	19	1300175	2
ENSG00000115286	NDUFS7	19	1334902	1
ENSG00000071626	DAZAP1	19	1358584	1
ENSG00000115266	APC2	19	1401148	1
ENSG00000115257	PCSK4	19	1432427	4
ENSG00000115255	REEP6	19	1442023	2
ENSG00000079313	REXO1	19	1766247	1
ENSG00000167475	SCAMP4	19	1856373	1
ENSG00000133275	CSNK1G2	19	1920719	1
ENSG00000099840	C19orf36	19	2035101	1
ENSG00000104897	SF3A2	19	2187816	1
ENSG00000104904	OAZ1	19	2220520	2
ENSG00000176619	LMNB2	19	2379165	2
ENSG00000104969	SGTA	19	2705712	5
ENSG00000125910	EDG6	19	3129766	1
ENSG00000141905	NFIC	19	3310616	1
ENSG00000173976	RAXL1	19	3448813	3
ENSG00000064961	HMG20B	19	3523943	1
ENSG00000105298	C19orf29	19	3561643	2
ENSG00000011132	APBA3	19	3701771	1
ENSG00000105229	PIAS4	19	3958748	1
ENSG00000178951	ZBTB7A	19	3996217	1
ENSG00000167680	SEMA6B	19	4493600	1
ENSG00000141965	FEM1A	19	4742728	2
ENSG00000034063	UHRF1	19	4860510	1
ENSG00000127663	JMJD2B	19	4920132	3
ENSG00000105426	PTPRS	19	5156519	1
ENSG00000167733	HSD11B1L	19	5632035	1
ENSG00000196365	LONP1	19	5642845	1
ENSG00000156413	FUT6	19	5781637	1
ENSG00000130383	FUT5	19	5817612	1
ENSG00000130382	MLLT1	19	6161393	1
ENSG00000125651	GTF2F1	19	6235754	1
ENSG00000125656	CLPP	19	6312463	1
ENSG00000171105	INSR	19	7063266	1
ENSG00000198723	C19orf45	19	7468460	1
ENSG00000032444	PNPLA6	19	7505043	2
ENSG00000104976	SNAPC2	19	7891229	1
ENSG00000178531	CTXN1	19	7895372	1
ENSG00000104980	TIMM44	19	7897604	1
ENSG00000066044	ELAVL1	19	7933159	1
ENSG00000186994	ANKRD47	19	8293469	1
ENSG00000181786	NP_848620.1	19	8668801	1
ENSG00000198028	ZNF560	19	9438009	1
ENSG00000130810	PPAN-P2RY11	19	10077965	1
ENSG00000130816	DNMT1	19	10105023	1
ENSG00000105364	MRPL4	19	10223640	1
ENSG00000090339	ICAM1	19	10242765	1
ENSG00000105376	ICAM5	19	10261655	1
ENSG00000076662	ICAM3	19	10305455	1
ENSG00000065989	PDE4A	19	10388449	2
ENSG00000130734	ATG4D	19	10515593	1
ENSG00000213339	QTRT1	19	10673131	1
ENSG00000142444	C19orf52	19	10900424	1
ENSG00000127616	SMARCA4	19	10932606	1
ENSG00000105518	NP_940938.1	19	11314452	1
ENSG00000183401	Q6ZSN3_HUMAN	19	11316357	1
ENSG00000105613	MAST1	19	12810348	3
ENSG00000179218	CALR	19	12910392	1
ENSG00000008441	NFIX	19	12967584	3
ENSG00000160888	IER2	19	13122282	1
ENSG00000132005	RFX1	19	13933353	1
ENSG00000072071	LPHN1	19	13949529	2
ENSG00000160951	PTGER1	19	14444279	1
ENSG00000127528	KLF2	19	16296637	2
ENSG00000127533	F2RL3	19	16860826	1
ENSG00000099331	MYO9B	19	17073466	1
ENSG00000160117	ANKRD41	19	17253681	1
ENSG00000074855	TMEM16H	19	17295034	1
ENSG00000130300	PLVAP	19	17323264	1
ENSG00000167483	FAM129C	19	17495110	1
ENSG00000105640	RPL18A	19	17831727	1
ENSG00000105650	PDE4C	19	18182010	1
ENSG00000130511	SSBP4	19	18391136	1
ENSG00000105655	NP_057452.1	19	18406625	1
ENSG00000006015	C19orf60	19	18560606	1
ENSG00000105696	TMEM59L	19	18584691	1
ENSG00000105662	CRTC1	19	18655425	1
ENSG00000105664	COMP	19	18754584	1
ENSG00000178093	TSSK6	19	19484230	1
ENSG00000160161	CILP2	19	19510074	2
ENSG00000105726	ATP13A1	19	19617009	2
ENSG00000205246		19	23737656	1
ENSG00000169021	UQCRFSL1	19	34390007	1
ENSG00000166289	PLEKHF1	19	34847803	1
ENSG00000198597	ZNF536	19	35555168	2
ENSG00000184771	NM_004364.2	19	38484084	1
ENSG00000153885	KCTD15	19	38979607	1
ENSG00000105699	LSR	19	40431399	1
ENSG00000105679	GAPDHS	19	40716154	1
ENSG00000105677	TMEM147	19	40728372	1
ENSG00000004776	HSPB6	19	40937336	1
ENSG00000075702	WDR62	19	41237660	1
ENSG00000105261	O00110_HUMAN	19	41293849	1
ENSG00000105258	POLR2I	19	41296452	1
ENSG00000161281	COX7A1	19	41333664	1
ENSG00000197808	ZNF461	19	41820123	1
ENSG00000196437	ZNF569	19	42593902	1
ENSG00000180458	Q8N3U1_HUMAN	19	42728213	1
ENSG00000105738	SIPA1L3	19	43089708	2
ENSG00000178934	LEG7_HUMAN	19	43971694	1
ENSG00000068903	SIRT2	19	44061061	1
ENSG00000128011	LRFN1	19	44489048	1
ENSG00000128016	ZFP36	19	44589293	1
ENSG00000186838	SELV_HUMAN	19	44697593	1
ENSG00000105219	CNTD2	19	45419962	1
ENSG00000167565	SERTAD3	19	45638591	1
ENSG00000160460	SPTBN4	19	45664966	1
ENSG00000105323	HNRPUL1	19	46460264	1
ENSG00000142025	DMRTC2	19	47040926	1
ENSG00000076928	ARHGEF1	19	47079106	1
ENSG00000167625	ZNF526	19	47416332	3
ENSG00000176472	ZNF575	19	48729169	1
ENSG00000167378	IRGQ	19	48787866	1
ENSG00000124449	IRGC	19	48912078	1
ENSG00000179846	NKPD1	19	50347036	2
ENSG00000213889	Q6P662_HUMAN	19	50692349	1
ENSG00000177886	Q8N819_HUMAN	19	50693705	1
ENSG00000170604	IRF2BP1	19	51079118	1
ENSG00000008438	PGLYRP1	19	51214255	1
ENSG00000160013	PTGIR	19	51815566	1
ENSG00000197380	DACT3	19	51842712	1
ENSG00000090372	STRN4	19	51914610	1
ENSG00000181027	FKRP	19	51941143	1
ENSG00000130751	NPAS1	19	52214941	1
ENSG00000063169	GLTSCR1	19	52874031	2
ENSG00000105483	CARD8	19	52918596	1
ENSG00000105486	LIG1	19	53310515	1
ENSG00000105464	GRIN2D	19	53589944	1
ENSG00000142235	LMTK3	19	53680342	2
ENSG00000063176	SPHK2	19	53814360	1
ENSG00000105538	RASIP1	19	53915655	1
ENSG00000196337	CGB7	19	54249344	2
ENSG00000126464	PRR12	19	54790591	1
ENSG00000010361	FUZ	19	55001987	1
ENSG00000039650	PNKP	19	55056274	1
ENSG00000131409	LRRC4B	19	55712640	1
ENSG00000161681	SHANK1	19	55856896	1
ENSG00000142549		19	56516573	1
ENSG00000197619	ZNF615	19	57186400	1
ENSG00000170954	ZNF415	19	58302945	1
ENSG00000182909	LENG9	19	59664788	1
ENSG00000125503	PPP1R12C	19	60294095	1
ENSG00000160469	BRSK1	19	60487139	1
ENSG00000197483	ZNF628	19	60492816	3
ENSG00000160471	COX6B2	19	60552888	1
ENSG00000108107	RPL28	19	60589112	1
ENSG00000179943	ZNF579	19	60780705	1
ENSG00000213015	ZNF580	19	60844121	1
ENSG00000173581	CCDC106	19	60850766	2
ENSG00000142409	ZNF787	19	61290544	2
ENSG00000197951	ZNF71	19	61798504	1
ENSG00000127903	NP_001005850.1	19	61866765	1
ENSG00000131864	USP29	19	62283753	1
ENSG00000152475	Q96EG3_HUMAN	19	63570805	2
ENSG00000171574	ZNF324B	19	63611867	1
ENSG00000131849	ZNF132	19	63635994	1
ENSG00000083812	ZNF324	19	63670275	3
ENSG00000119574	ZBTB45	19	63716711	1
ENSG00000177764	ZCCHC3	20	225737	1
ENSG00000177732	SOX12	20	254239	1
ENSG00000125841	NRSN2	20	275668	1
ENSG00000172070	SRXN1	20	575270	2
ENSG00000101361	NOL5A	20	2581178	1
ENSG00000101405	OXT	20	3000266	2
ENSG00000132646	PCNA	20	5043599	1
ENSG00000125863	MKKS	20	10333839	1
ENSG00000173404	INSM1	20	20296765	1
ENSG00000149435	GGTLA4	20	23913687	3
ENSG00000154930	ACSS1	20	24934874	1
ENSG00000207859	MIRN663	20	26137818	5
ENSG00000149599	DUSP15	20	29899102	1
ENSG00000101336	HCK	20	30103706	1
ENSG00000088305	DNMT3B	20	30813852	2
ENSG00000125967	APBA2BP	20	31708555	1
ENSG00000182584	C20orf134	20	31717965	1
ENSG00000131061	ZNF341	20	31783124	2
ENSG00000078804	TP53INP2	20	32755804	1
ENSG00000125998	FAM83C	20	33336950	1
ENSG00000197122	SRC	20	35407971	1
ENSG00000166619	BLCAP	20	35579233	1
ENSG00000053438	NNAT	20	35583021	1
ENSG00000101438	SLC32A1	20	36786519	1
ENSG00000101445	PPP1R16B	20	36867762	1
ENSG00000101447	FAM83D	20	36988369	1
ENSG00000124177	CHD6	20	39464584	1
ENSG00000124159	MATN4	20	43355499	1
ENSG00000124140	SLC12A5	20	44091242	1
ENSG00000101017	CD40	20	44180313	1
ENSG00000172315	TP53RK	20	44746412	1
ENSG00000196562	SULF2	20	45719063	1
ENSG00000124207	CSE1L	20	47096245	1
ENSG00000158445	KCNB1	20	47421912	1
ENSG00000124212	PTGIS	20	47553818	1
ENSG00000026559	KCNG1	20	49053601	1
ENSG00000101134	DOK5	20	52525570	1
ENSG00000054803	CBLN4	20	54005904	1
ENSG00000101144	BMP7	20	55178962	1
ENSG00000213705	GNAS3_HUMAN	20	56848168	1
ENSG00000087460	GNAS	20	56861431	1
ENSG00000101166	SLMO2	20	57041596	1
ENSG00000196074	SYCP2	20	57872016	1
ENSG00000184402	SS18L1	20	60152217	1
ENSG00000130706	ADRM1	20	60311422	1
ENSG00000130701	C20orf151	20	60418688	1
ENSG00000174403	C20orf200	20	60552199	1
ENSG00000174407	C20orf166	20	60558105	1
ENSG00000167046	Q5JT57_HUMAN	20	60742516	1
ENSG00000101187	SLCO4A1	20	60744242	1
ENSG00000101191	DIDO1	20	60979535	1
ENSG00000203905	Q6ZRC6_HUMAN	20	61111182	3
ENSG00000207598	hsa-mir-124a-3	20	61280297	1
ENSG00000101204	CHRNA4	20	61445109	1
ENSG00000075043	KCNQ2	20	61507986	2
ENSG00000125534	C20orf149	20	61622562	1
ENSG00000101213	PTK6	20	61630222	1
ENSG00000130589	PR285_HUMAN	20	61659884	3
ENSG00000197457	Q6ZN89_HUMAN	20	61741505	1
ENSG00000213603	STMN3	20	61741523	1
ENSG00000101246	ARFRP1	20	61801253	1
ENSG00000197114	ZGPAT	20	61809834	1
ENSG00000130584	ZBTB46	20	61845463	2
ENSG00000101150	TPD52L2	20	61959531	1
ENSG00000183260	C20orf135	20	61963295	1
ENSG00000101152	DNAJC5	20	61996962	1
ENSG00000216141	hsa-mir-941-4	20	62021289	1
ENSG00000216132	hsa-mir-941-4	20	62021401	1
ENSG00000216195	hsa-mir-941-4	20	62021540	1
ENSG00000215926	hsa-mir-941-4	20	62021652	1
ENSG00000171703	TCEA2	20	62158883	1
ENSG00000171700	RGS19	20	62174978	1
ENSG00000166157	TPTE	21	9928081	1
ENSG00000154640	BTG3	21	17887872	1
ENSG00000154645	CHODL	21	18195451	1
ENSG00000154734	ADAMTS1	21	27130479	1
ENSG00000156299	TIAM1	21	31412607	1
ENSG00000156304	SFRS15	21	31965217	1
ENSG00000186837	C21orf119	21	32687313	1
ENSG00000159079	C21orf59	21	32895848	1
ENSG00000205927	OLIG2	21	33320109	1
ENSG00000159110	IFNAR2	21	33524076	1
ENSG00000159212	CLIC6	21	34963558	1
ENSG00000159216	RUNX1	21	35081971	1
ENSG00000159263	SIM2	21	36993861	1
ENSG00000185808	PIGP	21	37359534	1
ENSG00000182670	TTC3	21	37367441	1
ENSG00000171587	DSCAM	21	40304796	1
ENSG00000182240	BACE2	21	41461598	1
ENSG00000173276	ZNF295	21	42280009	1
ENSG00000160193	WDR4	21	43136275	1
ENSG00000160208	RRP1B	21	43903860	1
ENSG00000141959	PFKL	21	44544358	1
ENSG00000184787	UBE2G2	21	45013384	1
ENSG00000183250	C21orf67	21	45177157	1
ENSG00000160256	C21orf70	21	45184355	2
ENSG00000197381	ADARB1	21	45318943	2
ENSG00000182871	COL18A1	21	45649480	1
ENSG00000173638	SLC19A1	21	45740677	2
ENSG00000183570	PCBP3	21	45888036	4
ENSG00000142156	COL6A1	21	46226091	3
ENSG00000160299	PCNT	21	46568483	1
ENSG00000069998	CECR5	22	15998411	2
ENSG00000182824	LOC727962	22	17101540	4
ENSG00000063515	GSCL	22	17516504	1
ENSG00000184113	CLDN5	22	17890575	1
ENSG00000184470	TXNRD2	22	18243040	2
ENSG00000183597	C22orf25	22	18388631	1
ENSG00000040608	RTN4R	22	18608953	1
ENSG00000188424	LOC729444	22	18705666	4
ENSG00000196622	K1666_HUMAN	22	18836382	1
ENSG00000187979	Q6ZPC6_HUMAN	22	18962132	4
ENSG00000188280	USP41	22	19022622	5
ENSG00000215498	LOC653203	22	19044640	5
ENSG00000099910	SCARF2	22	19108875	1
ENSG00000185214	KLHL22	22	19125806	1
ENSG00000169892	Q6ZQP7_HUMAN	22	19993055	5
ENSG00000169635	HIC2	22	20101693	2
ENSG00000099953	MMP11	22	22445036	1
ENSG00000100014	SPECC1L	22	22996866	1
ENSG00000128271	ADORA2A	22	22996866	1
ENSG00000100031	GGT1	22	23309718	1
ENSG00000178026	C22orf36	22	23311586	1
ENSG00000100276	RASL10A	22	28038923	2
ENSG00000182482	NP_001032755.1	22	29011108	1
ENSG00000100003	SEC14L2	22	29123031	1
ENSG00000133488	SEC14L4	22	29214900	1
ENSG00000100170	SLC5A1	22	30769259	1
ENSG00000100284	TOM1	22	34025845	1
ENSG00000100302	RASD2	22	34267296	1
ENSG00000100345	MYH9	22	35007273	1
ENSG00000166897	LRRC62	22	36099058	3
ENSG00000100156	SLC16A8	22	36804093	1
ENSG00000198792	TMEM184B	22	36945244	1
ENSG00000100181	NR_002821.1	22	37061698	1
ENSG00000100242	UNC84B	22	37460681	1
ENSG00000100372	SLC25A17	22	39495587	1
ENSG00000196419	XRCC6	22	40347241	1
ENSG00000167077	NP_689726.3	22	40425464	1
ENSG00000159958	TNFRSF13C	22	40650991	1
ENSG00000100162	CENPM	22	40654116	1
ENSG00000100167	37865	22	40702762	1
ENSG00000205702	NR_002570.2	22	40866158	1
ENSG00000182057	Q8IXR4_HUMAN	22	40995703	1
ENSG00000100347	SAMM50	22	42673949	1
ENSG00000188677	PARVB	22	42726506	1
ENSG00000077942	FBLN1	22	44277383	1
ENSG00000186951	PPARA	22	44925163	2
ENSG00000075275	CELSR1	22	45134397	2
ENSG00000075240	NP_055939.1	22	45401322	1
ENSG00000170714	FAM19A5	22	47264123	2
ENSG00000188511	C22orf34	22	48399294	3
ENSG00000100426	ZBED4	22	48633533	1
ENSG00000073146	MOV10L1	22	48870610	1
ENSG00000073150	PANX2	22	48951303	1
ENSG00000185386	MAPK11	22	49044271	1
ENSG00000196576	PLXNB2	22	49055535	4
ENSG00000025708	ECGF1	22	49311047	1
ENSG00000177989	NP_001014440.2	22	49315722	1
ENSG00000130487	KLHDC7B	22	49333328	2
ENSG00000100288	CHKB	22	49354156	1
ENSG00000205560	CPT1B	22	49354156	1
ENSG00000167393	PPP2R3B	X	214970	4
ENSG00000185960	SHOX	X	505079	1
ENSG00000198223	CSF2RA	X	1347693	1
ENSG00000056998	GYG2	X	2756859	1
ENSG00000006757	PNPLA4	X	7826804	1
ENSG00000101850	GPR143	X	9653454	1
ENSG00000182287	AP1S2	X	15753850	1
ENSG00000047230	CTPS2	X	16516047	1
ENSG00000086712	CXorf15	X	16714481	1
ENSG00000102098	SCML2	X	18167355	1
ENSG00000008086	CDKL5	X	18353646	2
ENSG00000185915	KLHL34	X	21582729	1
ENSG00000012174	MBTPS2	X	21767675	1
ENSG00000198767	YY2	X	21784026	1
ENSG00000123131	PRDX4	X	23592300	1
ENSG00000067992	PDK3	X	24393475	1
ENSG00000214107	MAGEB1	X	30171769	1
ENSG00000147036	LANCL3	X	37315741	1
ENSG00000165169	DYNLT3	X	37580954	2
ENSG00000165175	MID1IP1	X	38545651	2
ENSG00000180182	MED14	X	40392502	1
ENSG00000188937	NYX	X	41191631	1
ENSG00000069535	MAOB	X	43510804	1
ENSG00000102221	PHF16	X	46656680	1
ENSG00000008056	SYN1	X	47316244	1
ENSG00000068438	FTSJ1	X	48219493	1
ENSG00000147155	EBP	X	48265177	1
ENSG00000126768	TIMM17B	X	48635676	1
ENSG00000196998	WDR45	X	48819036	1
ENSG00000017621	MAGIX	X	48906005	1
ENSG00000101997	CCDC22	X	48978885	1
ENSG00000205777	GAGE4	X	49065460	3
ENSG00000189064	GAGE8	X	49065504	3
ENSG00000215274	GAGE7_HUMAN	X	49065504	3
ENSG00000198716	GAGE12G	X	49084544	2
ENSG00000215266	GAGE12H	X	49103593	3
ENSG00000205775	GAGE2A	X	49113126	3
ENSG00000215253	GAGE2_HUMAN	X	49122652	1
ENSG00000068990	GAGE12E	X	49193315	3
ENSG00000196368	NUDT11	X	51249603	2
ENSG00000184205	TSPYL2	X	53128278	1
ENSG00000086758	HUWE1	X	53575782	1
ENSG00000184083	FAM120C	X	54111482	1
ENSG00000169188	APEX2	X	55043505	1
ENSG00000147059	SPIN2A	X	57177688	1
ENSG00000130054	TMEM28	X	68641803	2
ENSG00000158813	EDA	X	68752636	1
ENSG00000184481	FOXO4	X	70232751	1
ENSG00000147162	OGT	X	70669658	1
ENSG00000147174	ACRC	X	70714986	1
ENSG00000215115		X	70851236	1
ENSG00000215113		X	70900227	1
ENSG00000186871	ERCC6L	X	71341232	1
ENSG00000085224	ATRX	X	76647847	1
ENSG00000165194	PCDH19	X	99433300	3
ENSG00000102362	SYTL4	X	99816144	1
ENSG00000166681	NGFRAP1	X	102517910	1
ENSG00000198088	NUP62CL	X	106253367	1
ENSG00000130224	LRCH2	X	114251441	2
ENSG00000175718	CXorf55	X	114331227	1
ENSG00000077721	UBE2A	X	118592527	1
ENSG00000186416	NKRF	X	118606328	1
ENSG00000125354	38961	X	118633715	1
ENSG00000101883	RHOXF1	X	119127053	1
ENSG00000213505	CT47A_HUMAN	X	119895381	2
ENSG00000203981	CT47A_HUMAN	X	119900248	2
ENSG00000213504	CT47A_HUMAN	X	119900248	3
[truncated: 31 more rows]
