# Supplementary material for: Frequent Long-Range Epigenetic Silencing of Protocadherin Gene Clusters on Chromosome 5q31 in Wilms' Tumor
Source: PLoS Genet. 2009 Nov 26;5(11):e1000745. doi: 10.1371/journal.pgen.1000745 (PMC2776977; doi:10.1371/journal.pgen.1000745)
Supplement: Table S2 — COBRA methylation summary. Methylation data from normal and tumour samples ascertained by combined bisulphite restriction analysis (COBRA). U, unmethylated; M, predominantly methylated; m, partially methylated. L and R, tumours of the left and right kidneys, respectively. (0.04 MB XLS) [file pgen.1000745.s010.xls]

## Sheet: Methylation summary
Table S2. COBRA methylation summary
Sample name	Sample type	HARS2	ZMAT2	PCDHA1	PCDHA13	PCDHAC1	PCDHAC2	PCDHB1	PCDHB3	PCDHB6	PCDHB8	PCDHB15	SLC25A2	TAF7	PCDHGA2	PCDHGA3	PCDHGB1	PCDHGB3	PCDHGA6	PCDHGA7	PCDHGB4	PCDHGA12	PCDHGC3	PCDHGC4	PCDHGC5	DIAPH1	HDAC3
WiT49	Wilms' tumour cell line	U	U	M	M	U	U	U	M	U	M	M	M	U	M	M	M	M	U	M	M	M	U	M	M	U	U
ANS2	Wilms' tumour	-	-	-	-	-	-	-	U	-	-	-	-	-	-	M	-	-	-	-	m	-	-	-	-	-	U
T10	Wilms' tumour	-	-	-	-	-	-	-	-	-	-	-	-	-	-	M	-	-	-	-	-	-	-	-	-	-	-
T11M	Wilms' tumour	-	-	-	-	-	-	-	M	-	-	-	-	-	m	-	M	-	-	-	-	-	-	-	-	-	-
T15M	Wilms' tumour	-	-	-	-	-	-	-	-	-	-	-	-	-	m	-	-	-	-	-	-	-	-	-	-	-	-
T24	Wilms' tumour	-	-	-	-	-	-	-	M	U	-	-	-	-	-	M	-	-	-	-	M	-	-	-	-	-	-
T43	Wilms' tumour	U	U	M	M	U	U	U	M	M	M	M	M	U	M	M	M	M	M	M	M	M	U	U	M	U	U
T45	Wilms' tumour	U	U	M	m	U	U	U	M	U	M	m	m	U	m	M	M	U	M	U	m	M	U	U	M	U	U
T49	Wilms' tumour	U	U	m	M	-	-	-	M	U	M	m	M	U	-	M	-	-	-	-	M	-	-	-	-	U	U
T53	Wilms' tumour	U	U	U	U	-	-	-	U	U	M	m	m	U	-	M	-	-	-	-	m	-	-	-	-	U	U
T54	Wilms' tumour	-	-	-	-	-	-	-	-	-	-	-	-	-	M	-	m	-	-	-	-	M	-	-	-	-	-
T543M	Wilms' tumour	-	-	-	-	-	-	-	M	U	-	-	-	-	M	M	-	-	-	-	-	-	-	-	-	-	-
T545M	Wilms' tumour	-	-	-	-	-	-	-	U	M	-	-	-	-	-	m	-	-	-	-	M	-	-	-	-	-	-
T562M	Wilms' tumour	-	-	-	-	-	-	-	M	-	-	-	-	-	-	m	-	-	-	-	m	-	-	-	-	-	-
T57	Wilms' tumour	U	U	M	m	U	U	U	M	M	M	M	M	U	m	M	m	m	M	M	M	m	U	U	m	U	U
T581M	Wilms' tumour	-	-	-	-	-	-	-	M	M	-	-	-	-	M	M	m	-	-	-	-	M	-	-	-	-	-
T59	Wilms' tumour	U	U	m	m	U	U	U	U	m	M	M	M	U	m	M	m	m	M	m	m	M	U	U	M	U	U
T5M	Wilms' tumour	-	-	-	-	-	-	-	m	-	-	-	-	-	-	-	m	-	-	-	-	-	-	-	-	-	-
T62L	Wilms' tumour	U	U	M	M	U	U	U	M	m	M	M	M	U	m	M	m	m	M	m	M	M	U	U	M	U	U
T62R	Wilms' tumour	U	U	m	M	U	U	U	M	M	m	M	M	U	m	M	m	M	M	m	M	M	U	U	M	U	U
T65L	Wilms' tumour	-	-	-	-	-	-	-	-	M	-	-	-	-	-	-	-	-	-	-	-	-	-	-	-	-	-
T65R	Wilms' tumour	-	-	-	-	-	-	-	-	M	-	-	-	-	-	-	-	-	-	-	-	-	-	-	-	-	-
T69	Wilms' tumour	U	U	M	m	U	U	U	M	U	M	M	M	U	U	M	m	M	U	M	M	M	U	U	m	U	U
T6M	Wilms' tumour	-	-	-	-	-	-	-	-	-	-	-	-	-	m	-	U	-	-	-	-	-	-	-	-	-	-
T7	Wilms' tumour	U	U	M	M	U	U	U	U	U	M	M	M	U	U	M	M	M	M	U	M	M	U	U	M	U	U
T71	Wilms' tumour	-	-	-	-	-	-	-	M	-	-	-	-	-	-	M	-	-	-	-	M	-	-	-	-	-	-
T72	Wilms' tumour	U	U	M	m	U	U	U	U	U	M	M	M	U	M	M	m	M	M	m	M	M	U	U	M	U	U
T783M	Wilms' tumour	-	-	-	-	-	-	-	U	U	-	-	-	-	-	M	-	-	-	-	m	-	-	-	-	-	-
T7M	Wilms' tumour	-	-	-	-	-	-	-	m	-	-	-	-	-	M	-	-	-	-	-	-	-	-	-	-	-	-
T872M	Wilms' tumour	-	-	-	-	-	-	-	M	U	-	-	-	-	-	M	-	-	-	-	m	-	-	-	-	-	-
WTHD1	Wilms' tumour	-	-	-	-	-	-	-	U	-	-	-	-	-	-	U	-	-	-	-	m	-	-	-	-	-	U
WTHD14	Wilms' tumour	-	-	-	-	-	-	-	M	-	-	-	-	-	-	M	-	-	-	-	m	-	-	-	-	-	U
WTHD2	Wilms' tumour	-	-	-	-	-	-	-	M	-	-	-	-	-	-	M	-	-	-	-	m	-	-	-	-	-	U
WTHD22	Wilms' tumour	-	-	-	-	-	-	-	U	-	-	-	-	-	-	U	-	-	-	-	U	-	-	-	-	-	U
WTHD23	Wilms' tumour	-	-	-	-	-	-	-	U	-	-	-	-	-	-	M	-	-	-	-	M	-	-	-	-	-	U
WTHD24	Wilms' tumour	-	-	-	-	-	-	-	U	-	-	-	-	-	-	U	-	-	-	-	U	-	-	-	-	-	U
WTHD28	Wilms' tumour	-	-	-	-	-	-	-	M	-	-	-	-	-	-	M	-	-	-	-	m	-	-	-	-	-	U
WTHD52	Wilms' tumour	-	-	-	-	-	-	-	U	-	-	-	-	-	-	M	-	-	-	-	M	-	-	-	-	-	U
WTHD9	Wilms' tumour	-	-	-	-	-	-	-	M	-	-	-	-	-	-	m	-	-	-	-	m	-	-	-	-	-	U
K28	Patient kidney	-	-	-	-	-	-	-	-	-	-	-	-	-	-	U	-	-	-	-	-	-	-	-	-	-	-
K54	Patient kidney	-	-	-	-	-	-	-	-	-	-	-	-	-	U	-	m	-	-	-	-	U	-	-	-	-	-
NK108	Normal Postnatal day 1 kidney	U	U	m	U	U	U	U	U	m	m	m	M	U	U	U	U	U	U	U	U	U	U	U	m	U	U
FK	Normal foetal kidney	U	U	m	U	U	U	U	U	m	m	m	M	U	U	U	U	U	U	U	U	U	U	U	m	U	U
FK108	Normal foetal kidney	U	U	m	U	U	U	U	U	m	m	m	M	U	U	U	U	U	U	U	U	U	U	U	m	U	U
FK2	Normal foetal kidney	U	U	m	U	U	U	U	U	m	m	m	M	U	U	U	U	U	U	U	U	U	U	U	m	U	U
FK609	Normal foetal kidney	U	U	m	U	U	U	U	U	m	m	m	M	U	U	U	U	U	U	U	U	U	U	U	m	U	U
FB	Normal foetal brain	U	U	m	U	U	U	U	U	m	m	m	M	U	U	U	U	U	U	U	U	U	U	U	m	U	U
NR62	Nephrogenic rest	-	-	-	-	-	-	-	-	U	-	-	-	-	-	-	-	-	-	-	-	-	-	-	-	-	-
NR65	Nephrogenic rest	-	-	-	-	-	-	-	-	U	-	-	-	-	-	-	-	-	-	-	-	-	-	-	-	-	-
HEK293	Embryonal kidney cell line	U	U	U	U	U	M	M	U	U	m	U	m	U	U	M	U	U	M	U	U	U	U	U	m	U	U
HCT116	Colorectal carcinoma cell line	-	-	-	-	-	-	-	-	M	M	-	-	-	M	M	M	M	m	-	-	M	-	-	-	-	-
